1 **Cobamide sharing drives skin microbiome dynamics**

2

3 Mary Hannah Swaney<sup>1</sup>, Shelby Sandstrom<sup>1,2</sup>, and Lindsay R Kalan<sup>1,3</sup>

4

5 <sup>1</sup>Department of Medical Microbiology and Immunology, School of Medicine and Public Health,  
6 University of Wisconsin, Madison, WI, USA

7 <sup>2</sup>Department of Bacteriology, College of Agricultural and Life Sciences, University of Wisconsin,  
8 Madison, WI, USA

9 <sup>3</sup>Department of Medicine, School of Medicine and Public Health, University of Wisconsin,  
10 Madison, WI, USA

11

12 Address for Correspondence: Lindsay R Kalan, 1550 Linden Dr, 6155 Microbial Sciences  
13 Building, Madison, WI, USA, 53706. [lkalan@wisc.edu](mailto:lkalan@wisc.edu)

14

15

16

17

18

19

20

21

22

23

24

25

26

27

28

29

30

31

32

33

34

35 **ABSTRACT**

36

37 The human skin microbiome is a key player in human health, with diverse functions ranging  
38 from defense against pathogens to education of the immune system. While recent studies have  
39 begun to shed light on the valuable role that skin microorganisms have in maintaining a healthy  
40 skin barrier, a detailed understanding of the complex interactions that shape healthy skin  
41 microbial communities is limited. Cobamides, the vitamin B<sub>12</sub> class of cofactor, are essential for  
42 organisms across the tree of life. Because this vitamin is only produced by a limited fraction of  
43 prokaryotes, cobamide sharing has been shown to mediate community dynamics within  
44 microbial communities. Here, we provide the first large-scale unbiased metagenomic  
45 assessment of cobamide biosynthesis and utilization in the skin microbiome. We show that  
46 while numerous and diverse taxa across the major bacterial phyla on the skin are cobamide  
47 dependent, relatively few species encode for *de novo* cobamide biosynthesis. We find that  
48 cobamide sharing shapes the network structure in microbial communities across the different  
49 microenvironments of the skin and that changes in community structure and microbiome  
50 diversity are driven by the abundance of cobamide producers in the *Corynebacterium* genus, in  
51 both healthy and disease skin states. Lastly, we find that *de novo* cobamide biosynthesis is  
52 enriched only in host-associated *Corynebacterium* species, including those prevalent on human  
53 skin. We confirm that the cofactor is produced in excess through quantification of cobamide  
54 production by skin-associated species isolated in the laboratory. Taken together, our results  
55 support a role for cobamide sharing within skin microbial communities, which we predict  
56 stabilizes the microbiome and mediates host interactions.

57

58

59

60

61

62

63

64

65

66

67

68

69

## 70 INTRODUCTION

71

72 The human skin supports a diverse and complex ecosystem of bacterial, fungal, viral, and  
73 microeukaryote species, termed the skin microbiome. Highly adapted to live on the skin, these  
74 microorganisms form distinct and specialized communities across the skin's sebaceous, moist,  
75 dry, and foot microenvironments. The skin microbiome plays a significant role in human health  
76 through contributing to immune system education and homeostasis, protecting against  
77 pathogen colonization, and promoting barrier maintenance and repair (Belkaid and Harrison,  
78 2017; Constantinides et al., 2019; Di Domizio et al., 2020; Linehan et al., 2018; Scharschmidt et  
79 al., 2017; Wanke et al., 2011).

80

81 The transition from taxonomic characterization of the skin microbiome towards study of the  
82 mechanisms driving microbe-microbe and microbe-host interactions has shed light on the truly  
83 complex nature of skin microbial communities. Recent work has demonstrated that skin  
84 commensals not only take part in synergistic and competitive interactions with other microbes  
85 (Christensen et al., 2016; Claesen et al., 2020; Nakatsuji et al., 2017; O'Sullivan et al., 2019;  
86 Wollenberg et al., 2014), but also participate in host interactions that can dictate skin health and  
87 function (Brandwein et al., 2017; Gallo and Nakatsuji, 2011; Naik et al., 2012; Scharschmidt et  
88 al., 2017; Uberoi et al., 2021). While these studies have provided fundamental insight into the  
89 roles that certain skin commensals, particularly *Staphylococcus* species and *Cutibacterium*  
90 *acnes*, play on the skin, our understanding of the forces that promote stability and mediate  
91 overall microbiome structure on healthy skin is still limited.

92

93 Within microbial communities, microorganisms interact at a fundamental level through the  
94 competition, acquisition, and sharing of nutrients. Nutritional interdependence, for example  
95 when one member produces a nutrient that is essential for another, has the potential to impact  
96 not only individual species dynamics, but also higher-level interactions, dictating microbial  
97 community organization, stability, and function. Of particular interest within microbial  
98 communities is sharing of the vitamin B<sub>12</sub> family of cobalt-containing cofactors, cobamides.  
99 Here, we use sharing, as previously defined by Sokolovskaya *et al.*, to mean the release of a  
100 nutrient or metabolite that is acquired and used by another microorganism (Sokolovskaya et al.,  
101 2020).

102

103 Cobamides are only synthesized *de novo* by a small fraction of bacteria and archaea, whereas  
104 the cofactor is essential for organisms across all domains of life, apart from land plants and  
105 fungi. They function in the catalysis of diverse enzymatic reactions, ranging from primary and  
106 secondary metabolism, including methionine and natural product biosynthesis, to  
107 environmentally impactful processes such as methanogenesis and mercury methylation  
108 (Sokolovskaya et al., 2020). Across bacteria, an estimated 86% of bacterial species have been  
109 found to encode at least one cobamide-dependent enzyme, whereas only 37% of all bacteria  
110 are predicted to produce the cofactor *de novo* (Shelton et al., 2019), suggesting that the majority  
111 of bacteria must acquire this important molecule externally. In addition, a unique feature of  
112 cobamides is their chemical diversity and functional specificity, with different microorganisms  
113 having distinct cobamide preferences and requirements. As such, numerous mechanisms exist  
114 for acquisition and use of preferred cobamide(s), including cobamide-specific gene regulation  
115 and selectivity by cobamide-dependent enzymes and transporters (Sokolovskaya et al., 2020).  
116 Therefore, considering the widespread dependence of cobamides, their limited biosynthesis  
117 across bacteria and archaea, and varying specificity organism-to-organism, cobamide sharing is  
118 hypothesized to be a major driver of microbial community dynamics. Indeed, *in vitro* and *in vivo*  
119 studies of microbial communities, including the human gut microbiome, have demonstrated that  
120 cobamide addition modulates community structure, cobamide composition, and expression of  
121 cobamide-related genes (Kelly et al., 2019; Men et al., 2015, 2017; Xu et al., 2018; Zhu et al.,  
122 2019). In the skin microbiome, however, the role of cobamides has never before been explored.

123  
124 In the present study, we analyzed 1176 healthy skin metagenomes to predict cobamide  
125 dependence and biosynthesis within the skin microbiome and find that phylogenetically diverse  
126 skin taxa are predicted to use cobamides, while only a small fraction of species can produce this  
127 essential cofactor *de novo*. Modelling of microbial networks shows that cobamide producers,  
128 users, and non-users form associations, suggesting a role for cobamide producers that extends  
129 beyond direct cobamide sharing. In addition, analysis of taxonomic data from skin  
130 metagenomes of four independent studies, including healthy and diseased skin samples,  
131 revealed that the abundance of cobamide-producing *Corynebacterium* species is associated  
132 with higher microbiome diversity, a key feature of skin health. Lastly, a comparative genomics  
133 analysis of 71 *Corynebacterium* species, representing diverse host and environment niche  
134 ranges, shows that *de novo* cobamide biosynthesis is almost exclusively present in genomes of  
135 host-associated species. Taken together, our results suggest that within the skin microbiome,

136 cobamide sharing is a critical mediator of community dynamics and may play a role in host-  
137 microbe interactions through promotion of microbiome diversity

138

## 139 **RESULTS**

140

### 141 **Cobamide biosynthesis and precursor salvage genes are encoded by select skin taxa.**

142 The *de novo* cobamide biosynthesis pathway is highly complex, consisting of at least 25  
143 enzymatic steps that can be divided into subsections, including tetrapyrrole precursor synthesis,  
144 aerobic or anaerobic corrin ring synthesis, nucleotide loop synthesis, and lower ligand synthesis  
145 (Figure 1). To determine if cobamide biosynthesis occurs within the skin microbiome, we  
146 queried cobamide biosynthesis genes in 1176 skin metagenomes, encompassing samples from  
147 22 distinct skin sites of 3 independent skin microbiome surveys, including the present study, Oh  
148 *et al.* (Oh *et al.*, 2016), and Hannigan *et al.* (Hannigan *et al.*, 2015). Using profile HMMs  
149 representing 12 genes within the *de novo* cobamide biosynthesis pathway, *cbiZ* as a marker of  
150 cobamide remodeling, and single-copy core gene *rpoB* as a marker of community structure, we  
151 found that samples from sebaceous sites harbored the overall highest median number of hits to  
152 cobamide biosynthesis genes, followed by dry, moist, and foot samples (Supplemental Figure  
153 1A).

154

155 To assess the contribution of different taxa to cobamide biosynthesis, the metagenomic  
156 sequence classifier pipeline Kraken and Bracken was used to classify the resulting gene hits.  
157 The top taxa encoding for biosynthetic genes in descending order were determined to be  
158 Propionibacteriaceae, Corynebacteriaceae, Veillonellaceae, Streptococcaceae,  
159 Dermacoccaceae, and Pseudomonadaceae. Within individual metagenomes, the contribution of  
160 each taxon to cobamide biosynthesis gene hits was calculated by dividing the number of  
161 biosynthesis gene hits assigned to a given taxa by the total number of biosynthesis gene hits  
162 within the sample. We found that Propionibacteriaceae was the dominant contributor to  
163 cobamide biosynthesis, particularly in sebaceous sites (Figure 2A).

164

165 For a finer resolution of taxon contribution, we determined the species contribution of 12 core  
166 cobamide biosynthesis genes for the top 40 abundant species within the dataset. Species  
167 encoding the full or nearly complete suite of cobamide biosynthesis markers was consistent  
168 across microenvironments, with *Cutibacterium acnes* being the dominant contributing species  
169 (Figure 2B). Other species contributing to most or all of the biosynthesis markers include

170 *Corynebacterium amycolatum*, *Corynebacterium kroppenstedtii*, *Corynebacterium*  
171 *glucuronolyticum*, *Veillonella parvula*, *Cutibacterium granulosum*, and *Propionibacterium* sp. oral  
172 taxon 193. A proportion of low abundance skin taxa were predicted to encode for the full suite of  
173 cobamide biosynthesis markers (grouped into the “Other” category), demonstrating that  
174 cobamide biosynthesis is encoded by both dominant and rare taxa.

175  
176 Taxa such as Moraxellaceae and Xanthomonadaceae encode for a limited set of cobamide  
177 biosynthesis genes including cobQ/cbiP, cobD/cbiB, cobP/cobU and cobS ([Supplemental Figure](#)  
178 [2](#)), which can function in cobamide precursor salvage (Gray et al., 2008; Rodionov et al., 2019).  
179 This suggests that cobamide synthesis through salvaging is also occurring on the skin.  
180 Furthermore, cobamides are grouped into three classes based on their structurally distinct lower  
181 ligand: benzimidazolyl, purinyl, and phenolyl cobamides (Sokolovskaya et al., 2020). Most  
182 predicted cobamide producers identified in this analysis likely synthesize benzimidazolyl  
183 cobamides because they encode for bluB, the gene responsible for the aerobic synthesis of  
184 lower ligand 5,6-dimethylbenzimidazole (DMB) ([Figure 2B](#), [Supplemental Figure 2](#)) (Campbell et  
185 al., 2006; Gray and Escalante-Semerena, 2007; Taga et al., 2007). However, in species such as  
186 *V. parvula*, *C. granulosum*, and *C. glucuronolyticum*, bluB is absent, suggesting that these  
187 species produce non-benzimidazolyl cobamides. Overall, our results demonstrate that select  
188 taxa within the skin microbiome have the genetic potential to produce chemically diverse  
189 cobamides through *de novo* biosynthesis or precursor salvage and that *de novo* biosynthesis is  
190 restricted to only a few species.

191  
192 **Phylogenetically diverse skin taxa are cobamide dependent**

193 Although few species within the skin microbiome synthesize cobamides *de novo*, we predict that  
194 a larger proportion use cobamides. We determined the prevalence of the cobamide transport  
195 protein btuB and 19 enzymes that carry out diverse cobamide dependent reactions. The median  
196 number of cobamide-dependent gene hits across samples varied by microenvironment  
197 ([Supplemental Figure 1](#)). Across the sebaceous, moist, and dry microenvironments,  
198 Propionibacteriaceae was the dominant family encoding for the cobamide-dependent enzymes  
199 D-ornithine aminomutase, methylmalonyl-CoA mutase, and ribonucleotide reductase class II  
200 ([Figure 3](#)). In contrast, across the remaining cobamide dependent enzymes, hits were assigned  
201 to phylogenetically diverse taxa across the four major phyla on the skin (Actinobacteria,  
202 Firmicutes, Proteobacteria, and Bacteroidetes) (Grice and Segre, 2011). Cobamide-dependent  
203 enzymes involved in primary metabolism, including methionine synthase, epoxyqueosine

204 reductase, ribonucleotide reductase, and ethanolamine lyase, were the most common cobamide  
205 dependent enzymes in the dataset ([Supplemental Figure 3](#)). Notably, only 1% of species  
206 appreciably contribute to de novo cobamide biosynthesis (n=18 species), yet approximately  
207 39% of species encode for cobamide dependent enzymes (n=638 species encoding at least  
208 one cobamide-dependent enzyme) ([Supplemental Figure 3](#)). While the true number of *de novo*  
209 cobamide producers may be underestimated due to filtering of rare and singleton hits prior to  
210 analysis, these species likely represent the core cobamide producers found on the skin. Overall,  
211 these results support a model of cobamide sharing, where a much larger number of skin taxa  
212 require cobamides than can produce the cofactor *de novo*.

213

### 214 **Regulation of cobamide biosynthesis is species-specific**

215 To further delineate cobamide usage within the skin microbiome, we identified cobalamin  
216 riboswitches within the metagenomes. Cobalamin riboswitches are cobamide-binding elements  
217 found in the untranslated region of bacterial mRNAs that regulate expression of genes or  
218 transcripts involved in cobamide-dependent metabolism, biosynthesis, and cobamide transport  
219 (Garst et al., 2011; Nahvi et al., 2004; Polaski et al., 2017). We show that phylogenetically  
220 diverse skin taxa encode for cobalamin riboswitches, with Propionibacteriaceae being the  
221 dominant taxa ([Figure 4A](#)). At the species level, these hits were found predominantly within *C.*  
222 *acnes* genomes.

223

224 To identify the pathways regulated by cobamides in *C. acnes*, we mapped cobalamin riboswitch  
225 sequence reads to the *C. acnes* KPA171202 reference genome. We find that riboswitches are  
226 distributed across the genome in numerous regions, regulating pathways involved in ABC  
227 transport, cobalt transport, cobamide biosynthesis, and cobamide-dependent and -independent  
228 reactions ([Figure 4B](#)). Three of the *C. acnes* cobalamin riboswitches (Regions 6, 7, and 8) are  
229 located upstream of pseudogenes or genes of unknown function ([Figure 4B](#)). Manual curation of  
230 these sequences suggest that the small pseudogenes are hypothetical adhesin protein  
231 fragments and the larger downstream sequences are thrombospondin type-3 repeat containing  
232 proteins ([Supplemental Material S4](#)). The role of cobalamin riboswitches in regulation of these  
233 genes is unknown, but suggests that cobalamin riboswitches are regulating diverse functions  
234 yet to be discovered.

235

236 We found fewer cobalamin riboswitches in the genomes of other species relative to *C. acnes*.  
237 Riboswitches were identified near gene neighborhoods with functions involved in cobamide

238 biosynthesis, ABC transport, cobalt transport, and both cobamide-dependent and cobamide-  
239 independent isozymes (Figure 4C-G). Unlike *C. acnes*, which tightly regulates cobamide  
240 biosynthesis, our data do not support riboswitch regulation of cobamide biosynthesis in *V.*  
241 *parvula*, *C. kroppenstedtii*, and *C. amycolatum*, suggesting constitutive *de novo* production of  
242 the molecule occurs on the skin. Overall, cobalamin riboswitches are likely to regulate diverse  
243 processes in the skin microbiome, including novel functions.

244

### 245 **Cobamide biosynthesis and usage shapes microbial network structures**

246 Having determined that cobamide producers, precursor salvagers, and users are prevalent  
247 within the skin microbiome, we sought out to determine how these members may be interacting,  
248 both with each other and with members who neither use nor produce cobamides. We utilized  
249 the SPIEC-EASI statistical method to infer microbial associations between common species on  
250 the skin (see Supplemental Material S5). Associations present in at least two of the three  
251 metagenomic studies were used to generate a final consensus network for each skin  
252 microenvironment.

253

254 Across all microenvironments, the majority of associations are positive, with few negative  
255 associations in each network (Figure 5A). The following measurements were used to quantify  
256 each network: node degree, density, transitivity, modularity, and phylum assortativity (see  
257 Supplemental Table 1 for a description of these properties). Overall, the moist environment  
258 network was the least sparse and modular and the most dense and transitive, suggestive of a  
259 more interconnected and less modular community. The dry network was the most sparse and  
260 modular and the least dense and transitive, suggesting the existence of interaction modules with  
261 dense connections between species of the same module. Sebaceous and foot networks fell in  
262 the middle of this spectrum. Across all microenvironments, we observed high assortativity by  
263 phylum, indicating a preference for species to associate with other species in the same phylum.

264

265 Across microenvironments, the distribution of species identified to be cobamide producers,  
266 precursor salvagers, and non-producers was relatively consistent, with more non-producers  
267 than producers or precursor salvagers (Figure 5B). The distribution of species identified to be  
268 cobamide dependent or not cobamide dependent was also consistent across  
269 microenvironments, with a generally equal number of cobamide-dependent species to  
270 cobamide-independent species in each network (Figure 5C). Edges were quantified based on  
271 cobamide biosynthesis category, showing more non-producer to non-producer edges, followed



272 by producer to non-producer, producer to producer, producer to precursor salvager, and lastly  
273 precursor salvager to non-producer (Figure 5D). The moist microenvironment has the largest  
274 number of edges between species that are *de novo* producers and those that are non-producers  
275 yet cobamide-dependent, followed by sebaceous, dry, and foot microenvironments. Overall, we  
276 find that associations between cobamide producers, precursor salvagers, non-producers, users,  
277 and non-users are distributed throughout the networks, suggesting that cobamide sharing  
278 between users and producers can impact microbial interactions within the entire network.

279

### 280 **Microbial diversity and community structure is driven by cobamide producer abundance.**

281 While the majority of bacteria are predicted to encode at least one cobamide-dependent  
282 enzyme, only 37% of bacteria are predicted to produce the cofactor *de novo* (Shelton *et al.*,  
283 2019). Therefore within microbial communities, cobamide sharing likely exists as a means to  
284 fulfill this nutritional requirement and is hypothesized to mediate community dynamics. On the  
285 skin, two of the top most abundant genera are *Cutibacterium* and *Corynebacterium*, both of  
286 which we found to include species that are *de novo* cobamide producers. Therefore, we  
287 hypothesize that changes at the community level are associated with the presence of these  
288 cobamide-producing species. To assess this, we first explored the relationship between  
289 microbiome diversity and cobamide-producing *Corynebacteria* (CPC) abundance within healthy  
290 skin metagenomes. NMDS ordination of Bray-Curtis dissimilarity indices revealed clustering that  
291 follows increasing gradients of both alpha diversity and CPC abundance, where alpha diversity  
292 increases as CPC abundance increases (Figure 6A, Supplemental Table 2). This was most  
293 striking for samples from sebaceous, moist, and foot sites. In contrast, this pattern of clustering  
294 was not observed for *Cutibacterium* cobamide producers, but rather samples with the highest  
295 *Cutibacterium* relative abundances often were the least diverse (Supplemental Figure 5).  
296 Furthermore, communities with a low CPC abundance were usually dominated by *Cutibacterium*  
297 *acnes*, whereas communities with high abundance showed an expansion of other skin taxa and  
298 an overall more even species distribution within the community (Supplemental Figure 6).  
299 Consistent with our analysis of riboswitch regulation, these results further support a model  
300 where *Corynebacterium* species constitutively produce cobamides as a shared common good,  
301 promoting microbiome diversity and structure. On the other hand, tightly regulated production by  
302 *Cutibacterium* species permits niche expansion and lower diversity.

303

### 304 **Cobamide production is depleted in atopic dermatitis**

305 A decrease in microbiome diversity is associated with increased pathogen colonization in  
306 dermatological disease such as atopic dermatitis (AD) (Paller et al., 2019; Williams, 2005). To  
307 assess the potential role of CPC in the AD skin microbiome, we analyzed 417 metagenomes  
308 from a cohort of 11 pediatric AD patients and 7 healthy controls. Microbiome structures  
309 exhibited a higher level of variability compared to the adult cohorts, with weak clustering of  
310 samples based on alpha diversity or CPC abundance. A subset of samples collected from moist  
311 sites during a flare formed a distinct cluster exhibiting low CPC abundance and alpha diversity  
312 (Supplemental Figure 7). AD skin symptoms often present in moist sites such as the antecubital  
313 fossa (bend of the elbow) and popliteal fossa (bend of the knee), suggesting a relationship  
314 between microbiome structure, diversity, and CPC abundance during AD flares. Consistent with  
315 this hypothesis, we observed that CPC abundance is significantly reduced in AD patients at  
316 baseline ( $p=0.0018$ ) as well as during flares ( $p=0.0050$ ) compared to healthy controls (Figure  
317 6B). Within individual patients, a sharp decrease in CPC abundance between baseline and flare  
318 occurs in a subset of patients, particularly in the antecubital fossa and popliteal fossa (Figure  
319 6C). Overall, differential CPC abundance is detected between disease states, suggesting a  
320 relationship between these members and microbial community structure in atopic dermatitis.

321

### 322 **Cobamide biosynthesis is enriched in host-associated *Corynebacterium* species**

323 Until recently, species of the *Corynebacterium* genus have been underappreciated as significant  
324 members of skin microbial communities, predominantly due to the difficulty of growing these  
325 species in the lab, which is a result of their nutritionally fastidious and slow-growing nature  
326 (Grice and Segre, 2011). However, sequencing efforts have revealed that *Corynebacteria* are a  
327 dominant taxon within the microbiome, particularly in moist skin microenvironments (Grice et al.,  
328 2009; Oh et al., 2014, 2016). Our results suggest an important role for cobamide production by  
329 skin-associated *Corynebacterium* species. Because other species within the *Corynebacterium*  
330 genus occupy highly diverse habitats, including soil, cheese rinds, coral mucus, and other  
331 human and animal body sites (Bernard, 2012), we were interested in exploring the genomic  
332 diversity within the *Corynebacterium* genus and how it relates to cobamide biosynthesis. To do  
333 so, we performed a pangenome analysis using *anvi'o*, which included 50 host-associated and  
334 21 environment-associated *Corynebacterium* genomes (Supplemental Material S8), acquired as  
335 complete assemblies from NCBI ( $n=68$ ) or as draft assemblies from human skin isolates ( $n=3$ ).  
336 Gene clusters (GCs), which are computed and used by *anvi'o*, represent one or more genes  
337 grouped together based on homology at the translated DNA sequence level (Delmont and Murat  
338 Eren, 2018). Across all species, 42,154 total GCs were identified. 495 of these are core GCs

339 present in all genomes, 13,235 GCs are shared (dispensable), and 28,424 GCs are found in  
340 only one genome (species-specific) (Supplemental Figures 8-9). Genome size ranged from 2.0  
341 to 3.6 Mbp, with an average of  $2.7 \pm 0.3$  Mbp, and the number of GCs per genome ranged from  
342 1858 to 3170 GCs, with an average of  $2365 \pm 294$  GCs (Supplemental Material S8). Host-  
343 associated species have significantly fewer GCs per genome compared to environment-  
344 associated species (2174 vs. 2664,  $p$ -value $<0.0001$ ) and a significantly reduced median  
345 genome length (2.52 Mbp vs 3.03 Mbp,  $p$ -value $<0.0001$ ) (Figure 7B, 7C).

346  
347 We determined functions that differ between host- and environment-associated genomes using  
348 a functional enrichment analysis. The top significantly enriched functions in environment-  
349 associated genomes include pathways putatively involved in amino acid transport, metabolism  
350 of various substrates including aromatic compounds, tetrahydropterin cofactors, and  
351 citrate/malate, and other uncharacterized functions ( $q < 0.05$ ) (Figure 7E). Within host-  
352 associated genomes, we observed a significant enrichment of pathways involved in the  
353 transport of various metabolites and ions, as well as 8 COG functions involved in cobamide  
354 biosynthesis ( $q < 0.05$ ) (Figure 7D). To identify and validate the presence of the *de novo*  
355 biosynthesis pathway within the 71 *Corynebacterium* genomes, we scanned the genomes using  
356 KOfamScan. Tetrapyrrole precursor synthesis, which is shared among the cobamide, heme,  
357 and chlorophyll biosynthesis pathways (Shelton et al., 2019), was conserved throughout the  
358 genus (Figure 7A). Corrin ring and nucleotide loop synthesis was intact and conserved within 5  
359 distinct *Corynebacterium* lineages, including those of *C. diphtheriae*, *C. epidermidicans*, *C.*  
360 *argenteratense*, *C. kroppenstedtii*, and *C. amycolatum*. The species within these groups encode  
361 for all or nearly all of the genes required for *de novo* cobamide biosynthesis, and notably, 21 out  
362 of 22 of these predicted cobamide producers are host-associated. Taken together, these results  
363 demonstrate a range of cobamide biosynthetic capabilities by Corynebacteria, with *de novo*  
364 producing species being almost exclusively host-associated, despite reduced genome size.  
365 Thus, we hypothesize a role for cobamides in mediating host-microbe interactions.

### 366 367 **Skin commensal *Corynebacterium amycolatum* produces high levels of cobamides.**

368 From our metagenomic and comparative genomic analyses, we identified *C. amycolatum* as a  
369 *de novo* cobamide producer. To test *in vitro* production of cobamides by this species, we  
370 isolated a strain of *C. amycolatum* from healthy skin, cultured it in a minimal growth medium,  
371 and prepared cell extracts from the intracellular metabolite content. We tested the cell extract in  
372 a microbiological assay using the indicator strain *E. coli* ATCC 14169, whose growth is

373 proportional to cobamide concentration from 0.1 to 1.5 ng/mL ([Supplemental Figure 10A](#)). When  
374 diluted 10,000- to 50,000-fold, *C. amycolatum* cell extracts yielded growth of *E. coli* within the  
375 linear range ([Supplemental Figure 10B](#)), with an average cobamide amount of  $1.51 \pm 0.135 \mu\text{g}$   
376 per gram of wet cell weight and an average intracellular concentration of  $11.3 \pm 2.37 \mu\text{M}$ .  
377 Physiological requirements of cobamides range from nanomolar to even picomolar  
378 concentrations (Sokolovskaya et al., 2020), supporting our hypothesis that *C. amycolatum*  
379 produces the cofactor in excess quantities to support cobamide sharing in the community.

380

## 381 **DISCUSSION**

382

383 This study, which provides the first in depth analysis of cobamide biosynthesis and use within  
384 skin microbial communities, contributes to the growing body of evidence that nutrient sharing is  
385 a critical driver of microbial community dynamics. Our analysis of skin metagenomic data  
386 demonstrates that phylogenetically diverse skin taxa, both high and low abundance, encode for  
387 metabolically diverse cobamide-dependent enzymes, as well as proteins involved in cobamide  
388 transport and salvage. Meanwhile, *de novo* producing skin species are greatly outnumbered by  
389 the total number of species that require cobamides for metabolism. In contrast to studies of  
390 cobamides in other microbial communities that have demonstrated *de novo* synthesis to be  
391 carried out by a relatively small fraction of the community (Lu et al., 2020; Magnúsdóttir et al.,  
392 2015; Romine et al., 2017), our results indicate that cobamides are produced by taxa  
393 considered to be dominant members within the skin microbiome, including *Cutibacterium* and  
394 *Corynebacterium* species. However, what is currently unknown is the extent to which  
395 cobamides produced by these dominant taxa are available for community use.

396

397 Our findings show that regulation of biosynthesis and use can vary drastically from taxa to taxa.  
398 For example, we show that *C. acnes* is the top species encoding for cobamide biosynthesis and  
399 dependent genes within the dataset, yet expression of these genes is under tight regulation by  
400 over ten cobalamin riboswitches. Conversely, other predicted cobamide producers on the skin,  
401 such as *C. amycolatum* and *C. kroppenstedtii*, only possess a few cobalamin riboswitches, and  
402 these riboswitches regulate cobamide-dependent, -independent, and transport functions, as  
403 opposed to cobamide biosynthesis. The absence of riboswitch-regulated biosynthesis genes is  
404 similarly observed across all Corynebacteriaceae (Sun et al., 2013). This suggests that  
405 constitutive expression of cobamide biosynthesis occurs in specific skin taxa. Overall, cobamide

406 production and riboswitch regulation are likely to act as important mediators of microbe-microbe  
407 interactions on the skin.

408  
409 Within microbial communities, cobamides are hypothesized to mediate community dynamics  
410 because of the relative paucity of cobamide producers, yet evident requirement for this cofactor  
411 across the bacterial domain of life (Degnan Patrick H. Taga Michiko E. Goodman, 2014; Shelton  
412 et al., 2019; Sokolovskaya et al., 2020). Our results suggest that on the skin, *Corynebacterium*  
413 cobamide-producing species promote microbiome diversity and dictate community structure in  
414 both healthy and diseased skin states. In addition, microbial association analysis identified  
415 associations between cobamide producers, users, as well as non-users, revealing the  
416 opportunity for cobamide sharing to impact microbiome dynamics at a community level.  
417 Because there exists a spectrum of ecological niches on the skin, we propose that in addition to  
418 the existence of cobamide sharing, cobamide-mediated interactions are dependent upon the  
419 spatial structure of skin microbial communities. For example, *C. acnes* is an anaerobe that  
420 predominantly resides deep within the anaerobic sebaceous follicle (Dréno et al., 2018),  
421 dominating between 60-90% of the follicle community (Hall et al., 2018). As such, the  
422 opportunity for cobamide-mediated interactions is likely reduced as a result of the *C. acnes*-  
423 dominated sebaceous gland. Approaching the more oxygenated skin surface, the community  
424 becomes more diverse (Oh et al., 2014), thus increasing the incidence of cobamide interactions  
425 and subsequent effects on community dynamics.

426  
427 *Corynebacteria* are well-equipped for growth on the skin due to their “lipid-loving” and  
428 halotolerant nature, allowing them to thrive in moist and sebaceous skin microenvironments  
429 (Scharschmidt and Fischbach, 2013). However, many questions remain about the processes  
430 that govern skin colonization by this relatively understudied skin taxa and how these processes  
431 may impact or be impacted by microbe-microbe and microbe-host interactions on the skin. We  
432 identified several *Corynebacterium* species to be *de novo* cobamide producers on the skin, and  
433 further, that the abundance of these species impacts microbial community dynamics through  
434 promotion of diversity. This suggests skin-associated *Corynebacteria* are a keystone species,  
435 leading us to perform a comparative genomics study of the entire genus. As expected, host-  
436 associated species have significantly smaller genomes, but unexpectedly, they are enriched for  
437 *de novo* cobamide biosynthesis as compared to environment-associated species. Retention of  
438 the energetically costly 25-enzyme cobamide biosynthesis pathway within host-associated

439 species, even with reduced genome size, suggests that synthesis of this cofactor is  
440 advantageous for host niche colonization.

441  
442 A key question that arises is why some *Corynebacterium* species have retained the *de novo*  
443 cobamide biosynthesis pathway, while others have not. Our results showed that  
444 *Corynebacterium* species encode for cobamide-dependent methionine synthase,  
445 methylmalonyl-CoA mutase, and ethanolamine ammonia lyase, consistent with previous  
446 findings by Shelton *et al.* (Shelton *et al.*, 2019). Therefore, cobamides are likely produced by  
447 Corynebacteria to fulfill metabolic requirements in methionine, propionate, and  
448 glycerophospholipid metabolism. Alternative cobamide-independent pathways exist for these  
449 functions, therefore cobamides may confer a distinct advantage for these species. Indeed,  
450 metE, the cobamide-independent methionine synthase, is sensitive to oxidative stress and has  
451 reduced turnover compared to metH (González *et al.*, 1992; Hondorp and Matthews, 2004;  
452 Leichert and Jakob, 2004). The skin in particular is subject to high oxidative stress as a result of  
453 metabolic reactions, cosmetics, and UV irradiation exposure. (Andersson *et al.*, 2019; Hakozaiki  
454 *et al.*, 2008; Kawashima *et al.*, 2018). Therefore, while the significance of employing cobamide-  
455 dependent vs -independent isozymes for bacterial metabolism on the skin is unknown, inherent  
456 features of the skin such as high oxidative stress may play a role.

457  
458 Our study further elucidates a potentially novel cobamide-mediated host-microbe interaction.  
459 We determined that 20 of 21 *Corynebacterium* species encoding for *de novo* biosynthesis are  
460 host-associated. Most of these species are characterized by their colonization of epithelial-  
461 associated sites (skin, oral cavity, nasal cavity) of their various hosts, including humans, other  
462 small and large mammals, and birds. While a clear role for cobamides in host-microbe  
463 interactions is not currently defined, Kang *et al.* have demonstrated that in humans, oral vitamin  
464 B<sub>12</sub> supplementation can repress cobamide biosynthesis genes of the skin microbiota, thus  
465 providing evidence that host-acquired cobamides are available to the microbiota through the  
466 skin (Kang *et al.*, 2015). Whether microbially-produced cobamides are accessible to the host  
467 through these epithelial surfaces is unknown, but warrants future investigation.

468  
469 Our findings reveal that cobamide dependence is widespread across the phylogenetic diversity  
470 of the skin microbiome, while a small number of skin taxa are capable of *de novo* production,  
471 including several species of the *Corynebacterium* genus. Within skin microbial communities,  
472 abundance of these cobamide-producing Corynebacteria is strongly associated with increased

473 microbiome diversity and disease state, supporting our hypothesis that cobamides are important  
474 mediators of microbiome structure and skin health. We also show that within the  
475 *Corynebacterium* genus, *de novo* cobamide biosynthesis is uniquely a host-associated function.  
476 Future studies to interrogate the role of cobamides in microbe-microbe and microbe-host  
477 interactions will provide insight into the key roles that microbially-derived metabolites play in  
478 microbial community dynamics and host health.

## 479 **Acknowledgements**

480 This work was supported by grants from the National Institutes of Health (NIAID U19AI142720  
481 [L.R.K.], NIAID T32AI055397 [M.H.S]). The content is solely the responsibility of the authors and  
482 does not necessarily represent the official views of the National Institutes of Health. This work  
483 used the Extreme Science and Engineering Discovery Environment (XSEDE), which is  
484 supported by National Science Foundation grant number ACI-1548562. Specifically, it used the  
485 Bridges system at the Pittsburgh Supercomputing Center (PSC) through allocation ID  
486 MCB200172. The authors gratefully acknowledge Dr. Michi Taga (UC Berkeley), Dr. Jorge  
487 Escalante (University of Georgia), and Dr. Michael Thomas (UW-Madison) for thoughtful  
488 discussion on cobamide biosynthesis and advice on the development of microbiological  
489 detection assays, and members of the Kalan Laboratory for feedback.

490

## 491 **Author Contributions**

492 Conceptualization, M.H.S and L.R.K.; Methodology, M.H.S, S.S., and L.R.K.; Formal Analysis,  
493 M.H.S., S.S.; Investigation, M.H.S, S.S., and L.R.K., Resources, L.R.K.; Data Curation, M.H.S.,  
494 S.S., and L.R.K.; Writing – Original Draft, M.H.S., S.S., and L.R.K; Writing – Review & Editing,  
495 M.H.S. and L.R.K.; Visualization, M.H.S.; Funding Acquisition, M.H.S. and L.R.K.; Supervision,  
496 L.R.K.

497

## 498 **Declaration of Interests**

499 The authors declare no competing interests.

500

## 501 **FIGURE LEGENDS**

502

503 **Figure 1. Simplified *de novo* cobamide biosynthesis pathway.** Subsections of the pathway  
504 are indicated by color, with gene names and white boxes indicating each enzymatic step.

505 Aerobic and anaerobic corrin ring synthesis pathways contain orthologous enzymes that are  
506 indicated with dashed lines. HemL in parentheses is required for synthesis from glutamate.

507  
508 **Figure 2. De novo cobamide biosynthesis is limited to distinct taxa on the skin.** A) Taxon  
509 contribution reflects the proportion of normalized cobamide biosynthesis gene hits assigned to  
510 each taxon out of the total normalized cobamide biosynthesis gene hits within a sample.  
511 Normalization was performed by dividing hits to each gene by its profile HMM length. Taxon  
512 contributions are shown for the top 6 taxa, grouped by skin site. Color indicates  
513 microenvironment classification. B) The top 40 most abundant bacterial species within the  
514 dataset were determined by totaling the hits to single copy gene *rpoB* for each species. The  
515 remaining species were grouped into “Other”. Individual values in the heatmap represent the  
516 number of hits assigned to the species for a particular cobamide biosynthesis gene divided by  
517 the total number of hits to the gene. Gene hits were normalized by profile HMM length and  
518 sequencing depth prior to calculation. Black squares represent taxonomic abundance from 0 to  
519 0.01%. The colored bar above cobamide biosynthesis genes indicates pathway subsection from  
520 Figure 1.

521  
522 **Figure 3. Phylogenetically diverse skin bacteria encode for cobamide dependent**  
523 **enzymes and transporters.** The total normalized hits for cobamide-dependent enzymes,  
524 cobamide transport protein *btuB*, and SCG *rpoB* are shown (total hits normalized to profile HMM  
525 coverage and sequence depth), with the taxonomic abundance of the hits expanded as relative  
526 proportions above. Hits to distinct B12-dependent radical SAM proteins are grouped together as  
527 “B12-dep radical SAM”.

528  
529 **Figure 4. Cobalamin riboswitch regulation varies across skin taxa.** A) The taxonomic  
530 abundance of hits for cobalamin riboswitches (Rfam clan CL00101) are shown, with an  
531 expanded view of low abundance hits to the right. Total cobalamin riboswitch hits within each  
532 microenvironment are indicated. Cobalamin riboswitch-containing reads identified from  
533 INFERNAL analysis were aligned to B) *Cutibacterium acnes* KPA171202, C) *Veillonella parvula*  
534 DSM 2008, D) *Pseudomonas putida* KT2440, E) *Corynebacterium kroppenstedtii* DSM 44385,  
535 F) *Corynebacterium amycolatum* FDAARGOS 1107, and G) *Streptococcus sanguinis* SK36  
536 genomes. Dark gray lines along the light grey genome track indicate the position of mapped  
537 INFERNAL hits within the genome. Genes upstream and downstream of the riboswitches are  
538 colored by their general functional annotation. White (other function) indicates genes not



539 currently known to be associated with cobamides. Grey (hypothetical) indicates a hypothetical  
540 protein that has no functional annotation. Right-facing gene arrows and upright dark gray  
541 riboswitch icons indicate forward strand orientation, and left-facing gene arrows and inverted  
542 riboswitch icons indicate reverse strand orientation. Genomic regions are not to scale.

543

544 **Figure 5. Skin microbiome networks reveal microbial associations among cobamide**

545 **producers, precursor salvagers, and users.** A) The SPIEC-EASI method was used to identify

546 microbial associations within each microenvironment of three independent skin microbiome

547 datasets. Consensus networks are shown, representing associations identified in at least 2 of

548 the 3 datasets. Species are represented by nodes and colored by phylum. Green and pink

549 edges represent positive and negative associations, respectively. Node shape represents

550 cobamide biosynthesis category and node size reflects mean species relative abundance within

551 each microenvironment. Cobamide dependent species are outlined in black. In each final

552 network, B) the number of species classified to each cobamide biosynthesis category, C) the

553 number of species that are cobamide dependent or independent, D) the percentage of total

554 edges that fall into each cobamide biosynthesis edge category, and E) the percentage of total

555 edges that exist between cobamide producers and cobamide dependent species that are non-

556 producers or precursor salvagers is shown. NP=Non-producer, P=Producer, S=Precursor

557 salvager.

558

559 **Figure 6. Cobamide-producing *Corynebacterium* abundance is associated with**

560 **microbiome diversity and atopic dermatitis disease state.** Within each metagenome, the

561 cumulative relative abundance of cobamide-producing *Corynebacteria* (CPC) was calculated. A)

562 NMDS plots based on Bray-Curtis indices for healthy adult samples within each skin

563 microenvironment are shown. Points are colored by *Corynebacterium* cobamide producer

564 relative abundance and sized by alpha diversity (Shannon). B) The relative abundance of CPC

565 in pediatric atopic dermatitis patients at baseline, flare, and post-flare timepoints or in healthy

566 control subjects. A pairwise Wilcoxon rank sum test was performed among each group with

567 FDR correction (\*<0.05, \*\*<0.01) (C) The relative abundance of CPC in each individual skin site

568 sampled. Black lines connect timepoints for a given patient. Certain sites were sampled from

569 both sides of the body, therefore each point represents the average abundance of for each

570 individual at the specified skin site.

571

572 **Figure 7. *De novo* cobamide biosynthesis is host-associated within the *Corynebacterium***  
573 **genus.** A) A *Corynebacterium* phylogenetic tree based on comparison of 71 conserved single  
574 copy genes was generated using FastTree within the anvi'o environment. The tree is rooted with  
575 *Tsukamurella paurometabola*, and bootstrapping values are indicated (\* = 100% bootstrap  
576 support). Species are colored by host (blue) or environment (orange) association, and by  
577 genome length (dark blue). KOfamScan was used to identify the presence (dark pink) or  
578 absence (light pink) of cobamide biosynthesis genes within each genome. Cobamide  
579 biosynthesis subsections are indicated and differentially colored based on B) Genome length  
580 and C) number of gene clusters for the *Corynebacterium* genomes were determined using  
581 anvi'o. Significantly enriched COG functions in D) host-associated or E) environment-associated  
582 genomes were identified with anvi'o. The top 20 significantly enriched COG functions ( $q < 0.05$ )  
583 are shown, ordered by ascending significance. Blue = host-associated, orange = environment-  
584 associated.  $* < 0.0001$  as calculated by Welch's unequal variances t-test.

585  
586 **Supplemental Figure 1. Read counts for cobamide biosynthesis genes, cobamide**  
587 **dependent genes, and *rpoB*.** The total sum of reads mapping to cobamide biosynthesis  
588 genes, cobamide dependent genes, or single-copy core gene *rpoB* within each sample are  
589 shown.

590  
591 **Supplemental Figure 2. *De novo* cobamide biosynthesis is restricted to select bacterial**  
592 **families on the skin.** The top 20 abundant bacterial families within the dataset were  
593 determined by totaling the hits to single copy gene *rpoB* for each family. The remaining families  
594 were grouped into "Other". Individual values in the heatmap represent the number of hits  
595 assigned to the family for a particular cobamide biosynthesis gene divided by the total number  
596 of hits to the gene. Gene hits were normalized by profile HMM coverage and sequencing depth  
597 prior to calculation. Black squares represent taxonomic abundance from 0 to 0.01%.

598  
599 **Supplemental Figure 3.** The number of unique species encoding single-copy core gene *rpoB*  
600 or 11 cobamide-dependent enzymes is shown. The number of unique *de novo* cobamide  
601 producers was determined by considering species with reads encoding for at least 5 of the 10  
602 cobamide biosynthesis gene markers.

603  
604 **Supplemental Figure 4.** For each microenvironment network, the relative frequency of nodes  
605 with each given degree is shown.

606

607 **Supplemental Figure 5.** Within each metagenome, the cumulative relative abundance of  
608 cobamide-producing Cutibacteria was calculated. A) NMDS plots based on Bray-Curtis indices  
609 for healthy adult samples within each skin microenvironment are shown. Points are colored by  
610 log<sub>10</sub> *Cutibacterium* cobamide producer abundance and sized by alpha diversity (Shannon).

611

612 **Supplemental Figure 6.** Relative abundance of metagenomes with low or high  
613 *Corynebacterium* cobamide producer abundance. The first (0.05%) and third (0.75%) quartiles  
614 of the cobamide-producing Corynebacteria (CPC) relative abundance across all samples were  
615 used to group samples below 0.05% or above 0.75% CPC abundance. Relative abundances for  
616 samples within each group are shown. Species less than 10% relative abundance within each  
617 sample are grouped into “Other”.

618

619 **Supplemental Figure 7.** Within each AD metagenome, the cumulative relative abundance of  
620 cobamide-producing Corynebacteria (CPC) was calculated. NMDS plots based on Bray-Curtis  
621 indices for pediatric AD samples within each skin microenvironment are shown. Points are  
622 colored by log<sub>10</sub> *Corynebacterium* cobamide producer relative abundance and sized by alpha  
623 diversity (Shannon). Shapes represent disease timepoint or healthy control.

624

625 **Supplemental Figure 8. Corynebacterium pangenome.** Pangenome analysis generated with  
626 anvio. 42,154 gene clusters (combined core, dispensable, and singletons) were identified from  
627 71 *Corynebacterium* genomes and are ordered by gene cluster frequency (opaque, present;  
628 transparent, absent). Each gene cluster contains one or more genes contributed by one or more  
629 genomes. Genomes are colored by ecosystem association and ordered by the phylogeny based  
630 on 71 single copy genes (unrooted). ANI scale (0.7-0.8). Singleton gene clusters (grey) are  
631 collapsed.

632

633 **Supplementary Figure 9. Corynebacterium singleton gene clusters.** The number of  
634 singleton gene clusters per genome A) was determined using anvio. B) Welch’s unequal  
635 variances t-test did not reveal a significant difference in singleton gene cluster count between  
636 host- and environment-associated genomes.

637

638 **Supplemental Figure 10. C. amycolatum cell extract supports growth of E. coli strain**  
639 **auxotrophic for cobamides.** *E. coli* ATCC 14169 was used as a microbiological indicator for

640 the detection of cobamide concentration in *C. amycolatum* LK19 cell extracts. A) Growth of *E.*  
641 *coli* was measured in minimal media with cyanocobalamin standards between 0.1 and 1.5  
642 ng/mL to generate a standard curve. B) *E. coli* growth with cyanocobalamin standards or  
643 different dilutions of cell extract. OOD600 values from 6 biological replicates and at least 3  
644 technical replicates are shown.

645

## 646 **METHODS**

647

### 648 **Subject recruitment and sample collection**

649 Healthy adult volunteers were recruited from the University of Wisconsin-Madison Microbial  
650 Sciences Building in Madison, WI, USA, from July through November 2019 under an  
651 institutional review board approved protocol. The single eligibility requirement was that the  
652 subject is over 18 years of age. Subjects provided written informed consent before participation.  
653 During each visit, 8 skin sites were sampled from that represent the physiologically diverse  
654 microenvironments of the skin: sebaceous (alar crease, occiput, back), moist (nare, antecubital  
655 fossa, umbilicus), dry (volar forearm), and foot (toe web space). Samples were collected by  
656 wetting a sterile foam swab (Puritan) with nuclease-free H<sub>2</sub>O and swabbing an approximately  
657 1x1 inch area of the right lateral skin site for 15 rotations. Swabs were collected into 300 µL  
658 Lucigen MasterPure™ Yeast Cell Lysis solution and stored at -80°C until DNA extraction.  
659 Negative control air swabs, room swabs, extraction kit controls, and mock community samples  
660 were collected and prepared for sequencing as well.

661

662 For extraction, samples were thawed on ice and incubated shaking at 37°C for 1 hour in an  
663 enzymatic cocktail of ReadyLyse (Epicenter), mutanolysin (Sigma), and lysostaphin (Sigma).  
664 Swabs were then centrifuged in a filter tube insert (Promega) for 60 seconds at 21,300 x g to  
665 remove all liquid from the swab. The liquid was added to a glass bead tube (Qiagen) and  
666 vortexed for 10 minutes followed by incubation at 65°C shaking for 30 minutes and 5 minutes on  
667 ice. The liquid was removed and added to MPC protein precipitation reagent, vortexed  
668 thoroughly, and centrifuged for 10 minutes at 21,300 x g. The resulting supernatant was  
669 combined with isopropyl alcohol and column purified using the Invitrogen PureLink Genomic  
670 DNA extraction kit. Lastly, DNA was eluted in 50 µL of elution buffer.

671

### 672 **Metagenomic sequencing, processing, and taxonomic classification**

673 Extracted DNA was prepared for sequencing by the University of Minnesota Genomics Center  
674 (UMGC) using the Nextera XT DNA Library Prep Kit (Illumina). Sequencing of the libraries was  
675 performed by UMGc on an Illumina NovaSeq (2 x 150 bp reads). We obtained 289 samples  
676 and 5.2 billion reads of non-human, quality-filtered, paired-end reads, with a median of 17.4  
677 million paired-end reads per skin sample. Raw sequence data has been deposited in the NCBI  
678 Sequence Read Archive (SRA) under BioProject ID PRJNA763232.

679

680

681 Quality filtering, adapter removal, human decontamination, and tandem repeat removal were  
682 performed using fastp v0.21.0 (Chen et al., 2018) and KneadData v0.8.0. Taxonomic  
683 classification and abundance estimation was performed using Kraken 2 v2.0.8-beta (Wood et  
684 al., 2019) and Bracken v2.5 (Lu et al., 2017), with a custom database that included complete  
685 bacterial, viral, archaeal, fungal, protozoan, and human genomes, along with UniVec core  
686 sequences, from RefSeq. We further modified the custom database to separate plasmid  
687 sequences from the RefSeq genomes, as we and others have observed incorrect taxonomic  
688 assignment of plasmid sequences using RefSeq taxonomy with Kraken 2 (Doster et al., 2019).  
689 Potential contaminant species were identified and removed using the prevalence method in  
690 decontam v1.10.0 (Davis et al., 2018) and through manual inspection of air swab samples  
691 compared to matched skin swabs, ensuring a high-quality sequence set. To compare analyses  
692 across studies, an additional 906 human skin shotgun metagenomic samples from Oh *et al.* (Oh  
693 *et al.*, 2016) and Hannigan *et al.* (Hannigan *et al.*, 2015) were retrieved from the SRA under  
694 BioProject IDs PRJNA46333 and PRJNA266117, respectively. Metagenomic reads across  
695 multiple SRA run accessions from the same biological sample were pooled, processed for  
696 quality control, and assigned taxonomy using the methods outlined above. In all, the  
697 metagenomic data represents the skin microbial communities across 21 distinct sites from 66  
698 healthy individuals. Sample information is described in Supplemental Material S1 and S2.

699

#### 700 **Choice of profile HMMs for skin metagenome survey of cobamide biosynthesis and use**

701 Profile HMMs, retrieved from the TIGRFam and Pfam databases, were used to detect cobamide  
702 biosynthesis, cobamide transport, and cobamide-dependent genes within skin metagenomic  
703 sequencing data. A total of 11 cobamide biosynthesis marker genes were selected because of  
704 their broad distribution throughout both the aerobic and anaerobic biosynthesis pathways and  
705 their presence within taxonomically-diverse cobamide producer genomes (Doxey et al., 2015;  
706 Lu et al., 2020; Shelton et al., 2019). CbiZ was included as a marker of cobamide remodeling,

707 and *btuB* was included to assess cobamide transport. 19 cobamide-dependent enzymes and  
708 proteins with B<sub>12</sub>-binding domains were chosen to evaluate cobamide use. The single-copy core  
709 gene *rpoB* was used as a phylogenetic marker to assess microbial community structure within  
710 each metagenome and as a proxy for sequence depth. All cobamide-associated genes used in  
711 this analysis can be found in Supplemental Material S3.

712

### 713 **Metagenomic sequence search using HMMER**

714 Sequencing reads from this study, Oh *et al.*, and Hannigan *et al.* were converted to FASTA  
715 format, retaining only forward read files for analysis. For biological samples with multiple SRA  
716 run accessions, only the largest run when considering base pair count was included for analysis  
717 (Supplemental Material S1 and S2). Metagenomes were translated to each of 6 frame  
718 translations using transeq from the emboss v6.6.0 package (Rice *et al.*, 2000). The program  
719 *hmmsearch* from HMMER v3.3.1 (Eddy, 2011) was used with default parameters and an E-  
720 value cutoff of 1E-06 to scan the metagenomic sequencing reads for homology to each  
721 cobamide-related HMM. The resulting hits were taxonomically classified to the species level  
722 using Kraken 2 (Wood *et al.*, 2019) and Bracken (Lu *et al.*, 2017). The number of hits for each  
723 gene was normalized to HMM length when analyzing individual metagenomes and to both HMM  
724 length and sequencing depth when analyzing groups of metagenomes. To reduce the rate of  
725 rare and singleton hits, species-gene pairings that did not appear in at least five samples from  
726 two or more datasets were excluded from further analysis. Taxonomic frequency profiles were  
727 generated for each cobamide-related gene by dividing the normalized number of gene hits per  
728 taxon by the total normalized number of gene hits.

729

### 730 **Metagenomic sequence search using INFERNAL**

731 Covariance models (CMs) for 3 cobalamin riboswitches from the Rfam clan CL00101 were  
732 retrieved from the Rfam database (Kalvari *et al.*, 2018) (Supplemental Material S3). The  
733 program *cmsearch* from INFERNAL v1.1.2 (Nawrocki and Eddy, 2013) was used with default  
734 parameters and an E-value cutoff of 1E-06 to scan the metagenomes for RNA homologs to  
735 cobalamin riboswitches. The methods following hit identification are the same as described  
736 above for HMM analysis, except that the number of hits for each riboswitch were not normalized  
737 by CM length because the read lengths and CM lengths were relatively similar.

738

### 739 **Mapping of cobalamin riboswitch hits to genomes**

740 Reads identified from INFERNAL were aligned against the complete genomes of *Cutibacterium*  
741 *acnes* KPA171202, *Veillonella parvula* DSM 2008, *Pseudomonas putida* KT2440,  
742 *Corynebacterium amycolatum* FDAAROS 1107, and *Streptococcus sanguinis* SK36 using  
743 bowtie2 v2.3.5.1 (Langmead and Salzberg, 2012) and visualized in R with the ggbio v1.30.0  
744 package (Yin et al., 2012). Genes upstream and downstream of the aligned reads within each  
745 genome were assigned functions based on NCBI RefSeq annotations and visualized using the  
746 gggenes v0.4.0 R package. Genes within genomic regions that encoded for a cobalamin  
747 riboswitch but had no genes currently known to be under cobalamin riboswitch control were  
748 assigned putative functions based on the top hit from NCBI BLAST searches against the nt/nr  
749 nucleotide collection database.

750

### 751 **SPIEC-EASI microbial network inference**

752 The statistical method SPIEC-EASI from the SpiecEasi R package v1.0.7 (Kurtz et al., 2015)  
753 was used to identify associations between microbial species in the skin metagenomes. Samples  
754 included for analysis are indicated in Supplemental Material S1 and S2; samples with  
755 comparatively low read counts within each dataset were excluded. Species were included for  
756 analysis if they were present at greater than 0.015% average abundance and identified in at  
757 least 55% of the samples, resulting in 185 final species Supplemental Material S5). SPIEC-EASI  
758 (neighborhood selection mode) was performed on samples grouped by both microenvironment  
759 and study, resulting in 12 total networks. Consensus networks were created for each  
760 microenvironment by merging sign-consistent edges from the node and edge sets identified for  
761 each study, requiring that each edge appear in at least 2 of the 3 datasets (Kurtz et al., 2019).  
762 The R package igraph v1.2.6 (Csardi et al., 2006) was used for network visualization and  
763 calculation of topological network properties.

764

765 To incorporate cobamide biosynthesis and dependence information into the network analysis,  
766 data from Supplementary Table 5 of Shelton *et al.* (Shelton *et al.*, 2019) was used to assess the  
767 presence of cobamide dependent enzymes and the potential for cobamide biosynthesis or  
768 precursor salvage in each species in the consensus networks. For each species, the presence  
769 of 7 cobamide-dependent enzymes ('B12-dependent RNR', 'methH', 'methylmalonyl-CoA mutase  
770 family', 'ethanolamine ammonia lyase', 'B12-dependent glycerol/diol dehydratase', 'D-ornithine  
771 4,5-aminomutase', 'epoxyqueosine reductase') was determined, and the 'cobamide biosynthesis  
772 category' was used to assign cobamide biosynthesis potential. These 7 cobamide dependent  
773 enzymes were chosen because they represent those most abundant on the skin (Figure 3). For

774 any consensus network species absent from the Shelton *et al.* dataset, KO identifiers in  
775 Supplemental Material S6 were searched against NCBI RefSeq complete assembled genomes  
776 for each species using KOfamScan, a functional annotation program based on KOs and HMMs  
777 (Aramaki *et al.*, 2020). Genomes were then scored for cobamide biosynthesis category based  
778 on the presence of certain sets of cobamide biosynthesis genes (Supplemental Material S5 and  
779 S6).

780

### 781 **Microbiome diversity analysis of *Corynebacterium* cobamide producers**

782 For microbiome diversity analyses of the healthy adult skin microbiome, metagenomes from this  
783 study and Oh *et al.* (Oh *et al.*, 2016) were subsampled to 1.5 million read counts using  
784 `rarefy_even_depth()` from the phyloseq R package v1.34.0 (McMurdie and Holmes, 2013),  
785 discarding samples below this read count cutoff. Samples included for analysis are indicated in  
786 Supplemental Material S1 and S2; samples from Hannigan *et al.* (Hannigan *et al.*, 2015) were  
787 excluded from analysis due to comparatively lower sequencing depth; median 1.2 million  
788 (Hannigan) vs 17.4 million (this study) and 16.9 million (Oh) final paired-end reads. To adjust for  
789 study effect, `adjust_batch()` from the MMUPHin R package v1.5.2 (Ma, 2021) was used. Using  
790 taxonomic abundance information, the cumulative relative abundance of *Corynebacterium*  
791 species that encode for *de novo* cobamide biosynthesis was calculated for each metagenome.  
792 Alpha diversity was determined by calculating the Shannon index using the `phyloseq diversity()`  
793 function. For beta diversity analysis, abundances were square root transformed to give more  
794 weight to low abundance taxa, and the Bray-Curtis dissimilarity index was calculated for  
795 samples within each skin site using `vegdist()` from the `vegan` v2.5-6 package. The indices were  
796 ordinated using non-metric multidimensional scaling with the `vegan metaMDS()` program. For  
797 analysis of the pediatric atopic dermatitis microbiome, metagenomes from Byrd *et al.* (Byrd *et al.*  
798 *et al.*, 2017) were accessed from the SRA, processed, and assigned taxonomy using the  
799 described methods (Supplemental Material S7). Samples MET1440, MET1441, MET1449,  
800 MET1552, and MET1563 were excluded due to insufficient sequence data after processing.  
801 Analysis of *Corynebacterium* cobamide producer abundance and alpha and beta diversity was  
802 performed as outlined above.

803

### 804 ***Corynebacterium* comparative genomics**

805 71 *Corynebacterium* isolate genomes were acquired either from the National Center for  
806 Biotechnology Information (NCBI) as complete assemblies or from human skin isolates as draft  
807 assemblies. Supplemental Material S8 reports accession numbers and other information for



808 each isolate genome, including ecosystem association, which was assigned using strain  
809 metadata and species-specific literature. The pangenomics workflow from anvi'o v6.2  
810 (<http://merenlab.org/2016/11/08/pangenomics-v2/>) (Delmont and Murat Eren, 2018; Eren et al.,  
811 2015) was used for comparative genomics analysis. Briefly, genomes were annotated using  
812 'anvi-run-ncbi-cogs', which assigns functions from the NCBI Clusters of Orthologous Groups  
813 (COGs) database. The *Corynebacterium* pangenome was computed using the program 'anvi-  
814 pan-genome' with the flags '--minbit 0.5', '--mcl-inflation 6', and '--enforce-hierarchical-  
815 clustering'. Average nucleotide identity between genomes was calculated using pyani within the  
816 anvi'o environment (<https://github.com/widdowquinn/pyani>) (Pritchard et al., 2015). The program  
817 'anvi-get-enriched-functions-per-pan-group' was utilized to identify enriched COGs between  
818 host- and environment-associated genomes (Shaiber et al., 2020). Genome summary statistics  
819 are presented in Supplemental Material S8.

820

### 821 ***Corynebacterium* phylogenetic analysis**

822 The anvi'o phylogenomics workflow (<http://merenlab.org/2017/06/07/phylogenomics/>) was used  
823 to create a *Corynebacterium* phylogeny. Within the anvi'o environment, single-copy core genes  
824 (SCGs) from the curated anvi'o collection Bacteria\_71 were identified within each genome using  
825 HMMER (Eddy, 2011), and the SCG amino acid sequences were concatenated and aligned  
826 using MUSCLE (Edgar, 2004). A phylogenetic tree was then constructed using FastTree (Price  
827 et al., 2010) within the anvi'o environment, and *Tsukamurella paurometabola* DSM 20162 was  
828 included as an outgroup to root the tree. To identify cobamide biosynthesis genes within the 71  
829 *Corynebacterium* genomes, KEGG orthology (KO) identifiers from KEGG map00860  
830 (Supplemental Material S6) were used to create a custom profile for KOfamsan. Each genome  
831 was queried against this profile, and hits to the KOs above the predefined inclusion threshold or  
832 user-defined threshold (cobU/cobT, cobC, and bluB), were considered for further analysis.  
833 Visualization of the phylogenetic tree and cobamide biosynthesis pathway completeness was  
834 performed in R with the ggtree package v2.4.2 (Yu et al., 2017).

835

### 836 ***Corynebacterium* minimal M9 (CM9) medium composition and preparation**

837 11.28 g/L M9 salts, 0.1 g/L L-dextrose, and 0.2% Tween 80 were prepared in aqueous solution  
838 and autoclaved at 121°C for 15 minutes. We and others have observed that autoclaving a small  
839 amount of L-dextrose in the presence of other media components improves rapid and abundant  
840 growth of *Corynebacterium* species in synthetic media (Liebl et al., 1989). When cooled, the  
841 following media components were added at the concentrations indicated: 0.1 mM CaCl<sub>2</sub>, 2 mM

842 MgSO<sub>4</sub>, 50 nM CoCl<sub>2</sub>, 6 μM thiamine-HCl, 1.9 g/L L-dextrose, 100 mg/L L-arginine, 2 mg/L  
843 biotin.

844

#### 845 ***Corynebacterium amycolatum* cell extract preparation**

846 *C. amycolatum* LK19, isolated from healthy adult skin, was cultured overnight in BHI with 0.2%  
847 Tween 80. To remove residual cobamides in the media and scale up culture conditions, cells  
848 were washed 3 times with CM9 broth, inoculated into 250-mL CM9 broth (starting OD<sub>600</sub> = 0.1),  
849 and incubated shaking at 37°C for 24 hours. Cells were again washed, inoculated into 1-L CM9  
850 broth (starting OD<sub>600</sub> = 0.1), and incubated shaking at 37°C for 48 hours. Cells were spun  
851 down at 4000 rpm for 20 minutes, wet cell weight was recorded, and 20 mL methanol per 1 g  
852 wet cell weight was added for metabolite extraction. To convert cobamides to their cyano form,  
853 20 mg potassium cyanide was added per 1 g wet cell weight, and the cell suspension was  
854 heated at 60°C for 90 minutes and mixed intermittently every 20 minutes. Following overnight  
855 room temperature incubation, cell debris was removed, and the solvent was evaporated using a  
856 rotary evaporator. The resulting extract was de-salted with a C18 Sep-Pak (Waters) cartridge.  
857 Briefly, the cell extract was suspended in 10-ml H<sub>2</sub>O and run through the cartridge, followed by a  
858 20-mL H<sub>2</sub>O wash and elution of the cobamide-containing fraction with 3-mL methanol. The de-  
859 salted extract was dried in the fume hood and resuspended in 1.1 mL H<sub>2</sub>O for subsequent  
860 analysis.

861

#### 862 **Microbiological cobamide indicator assay**

863 *E. coli* strain ATCC 14169, which requires either cobamide or methionine supplementation for  
864 growth, was acquired from the NRRL Culture Collection. The strain was cultured for 6 hours in  
865 BHI with 0.2% Tween 80 and washed 3 times with M9 minimal medium (11.28 g/L M9 salts  
866 (Sigma-Aldrich), 0.1 mM CaCl<sub>2</sub>, 0.2 mM MgSO<sub>4</sub>, 1 mM thiamine-HCl, 2 g/L L-dextrose, 100  
867 mg/L L-arginine). Cells were adjusted to an OD<sub>600</sub> of approximately 0.02 in M9 minimal  
868 medium. In each well of a 96-well plate, 200 μL of cells and 2.5 μL of sample (cyanocobalamin  
869 standards or *C. amycolatum* LK19 cell extract dilutions) were added. The plate was incubated  
870 stationary at 37°C for 18 hours, and OD<sub>600</sub> values were recorded using a BioTek Epoch 2  
871 Microplate Spectrophotometer. A standard curve was generated using cyanocobalamin  
872 concentrations between 0.1 and 1.5 ng/mL, and this was used to calculate cobamide  
873 concentration in the cell extracts. Intracellular concentrations were estimated assuming a  
874 cellular volume of 1 μm<sup>3</sup> and 8x10<sup>8</sup> cells/mL at an OD<sub>600</sub> of 1.0 (Sokolovskaya et al., 2019).

## 875 Quantification and Statistical Analysis

876 The R Statistical Package was used to generate figures and compute statistical analyses.  
877 Statistical significance was verified through the non-parametric Wilcoxon rank-sum test with  
878 FDR correction or Welch's unequal variances t-test. Correlations between cobamide-producing  
879 Corynebacteria abundance and Shannon diversity were calculated using the Spearman rank  
880 coefficient.

881

882

## 883 REFERENCES

884 Andersson, T., Ertürk Bergdahl, G., Saleh, K., Magnúsdóttir, H., Stødkilde, K., Andersen,  
885 C.B.F., Lundqvist, K., Jensen, A., Brüggemann, H., and Lood, R. (2019). Common skin bacteria  
886 protect their host from oxidative stress through secreted antioxidant RoxP. *Sci. Rep.* *9*, 3596.

887 Aramaki, T., Blanc-Mathieu, R., Endo, H., Ohkubo, K., Kanehisa, M., Goto, S., and Ogata, H.  
888 (2020). KofamKOALA: KEGG Ortholog assignment based on profile HMM and adaptive score  
889 threshold. *Bioinformatics* *36*, 2251–2252.

890 Belkaid, Y., and Harrison, O.J. (2017). Homeostatic Immunity and the Microbiota. *Immunity* *46*,  
891 562–576.

892 Bernard, K. (2012). The genus corynebacterium and other medically relevant coryneform-like  
893 bacteria. *J. Clin. Microbiol.* *50*, 3152–3158.

894 Brandwein, M., Bentwich, Z., and Steinberg, D. (2017). Endogenous Antimicrobial Peptide  
895 Expression in Response to Bacterial Epidermal Colonization. *Front. Immunol.* *8*, 1637.

896 Byrd, A.L., Deming, C., Cassidy, S.K.B., Harrison, O.J., Ng, W.-I., Conlan, S., NISC  
897 Comparative Sequencing Program, Belkaid, Y., Segre, J.A., and Kong, H.H. (2017).  
898 *Staphylococcus aureus* and *Staphylococcus epidermidis* strain diversity underlying pediatric  
899 atopic dermatitis. *Sci. Transl. Med.* *9*.

900 Campbell, G.R.O., Taga, M.E., Mistry, K., Lloret, J., Anderson, P.J., Roth, J.R., and Walker,  
901 G.C. (2006). *Sinorhizobium meliloti* bluB is necessary for production of 5,6-  
902 dimethylbenzimidazole, the lower ligand of B12. *Proc. Natl. Acad. Sci. U. S. A.* *103*, 4634–4639.

903 Chen, S., Zhou, Y., Chen, Y., and Gu, J. (2018). fastp: an ultra-fast all-in-one FASTQ  
904 preprocessor. *Bioinformatics* *34*, i884–i890.

905 Christensen, G.J.M., Scholz, C.F.P., Enghild, J., Rohde, H., Kilian, M., Thürmer, A.,  
906 Brzuszkiewicz, E., Lomholt, H.B., and Brüggemann, H. (2016). Antagonism between  
907 *Staphylococcus epidermidis* and *Propionibacterium acnes* and its genomic basis. *BMC*  
908 *Genomics* *17*, 152.

909 Claesen, J., Spagnolo, J.B., Ramos, S.F., Kurita, K.L., Byrd, A.L., Aksenov, A.A., Melnik, A.V.,

- 910 Wong, W.R., Wang, S., Hernandez, R.D., et al. (2020). A Cutibacterium acnes antibiotic  
911 modulates human skin microbiota composition in hair follicles. *Sci. Transl. Med.* 12.
- 912 Constantinides, M.G., Link, V.M., Tamoutounour, S., Wong, A.C., Perez-Chaparro, P.J., Han,  
913 S.-J., Chen, Y.E., Li, K., Farhat, S., Weckel, A., et al. (2019). MAIT cells are imprinted by the  
914 microbiota in early life and promote tissue repair. *Science* 366.
- 915 Csardi, G., Nepusz, T., and Others (2006). The igraph software package for complex network  
916 research. *InterJournal, Complex Systems* 1695, 1–9.
- 917 Davis, N.M., Proctor, D.M., Holmes, S.P., Relman, D.A., and Callahan, B.J. (2018). Simple  
918 statistical identification and removal of contaminant sequences in marker-gene and  
919 metagenomics data. *Microbiome* 6, 226.
- 920 Degnan Patrick H. Taga Michiko E. Goodman, A.L. (2014). Vitamin B12 as a modulator of gut  
921 microbial ecology. *Cell Metab.* 20, 1–769 – 778.
- 922 Delmont, T.O., and Murat Eren, A. (2018). Linking pangenomes and metagenomes: the  
923 Prochlorococcus metapangenome. *PeerJ* 6, e4320.
- 924 Di Domizio, J., Belkhdja, C., Chenuet, P., Fries, A., Murray, T., Mondéjar, P.M., Demaria, O.,  
925 Conrad, C., Homey, B., Werner, S., et al. (2020). The commensal skin microbiota triggers type I  
926 IFN-dependent innate repair responses in injured skin. *Nat. Immunol.* 21, 1034–1045.
- 927 Doster, E., Rovira, P., Noyes, N.R., Burgess, B.A., Yang, X., Weinroth, M.D., Linke, L.,  
928 Magnuson, R., Boucher, C., Belk, K.E., et al. (2019). A Cautionary Report for Pathogen  
929 Identification Using Shotgun Metagenomics; A Comparison to Aerobic Culture and Polymerase  
930 Chain Reaction for Salmonella enterica Identification. *Front. Microbiol.* 10, 2499.
- 931 Doxey, A.C., Kurtz, D.A., Lynch, M.D.J., Sauder, L.A., and Neufeld, J.D. (2015). Aquatic  
932 metagenomes implicate Thaumarchaeota in global cobalamin production. *ISME J.* 9, 461–471.
- 933 Dréno, B., Pécastaings, S., Corvec, S., Veraldi, S., Khammari, A., and Roques, C. (2018).  
934 Cutibacterium acnes ( Propionibacterium acnes ) and acne vulgaris: a brief look at the latest  
935 updates. *J. Eur. Acad. Dermatol. Venereol.* 32, 5–14.
- 936 Eddy, S.R. (2011). Accelerated profile HMM searches. *PLoS Comput. Biol.* 7, 1002195.
- 937 Edgar, R.C. (2004). MUSCLE: multiple sequence alignment with high accuracy and high  
938 throughput. *Nucleic Acids Res.* 32, 1792–1797.
- 939 Eren, A.M., Esen, O.C., Quince, C., Vineis, J.H., Morrison, H.G., Sogin, M.L., and Delmont, T.O.  
940 (2015). Anvi'o: An advanced analysis and visualization platform for 'omics data. *PeerJ* 2015,  
941 e1319.
- 942 Gallo, R.L., and Nakatsuji, T. (2011). Microbial symbiosis with the innate immune defense  
943 system of the skin. *J. Invest. Dermatol.* 131, 1974–1980.
- 944 Garst, A.D., Edwards, A.L., and Batey, R.T. (2011). Riboswitches: Structures and mechanisms.  
945 *Cold Spring Harbor Perspectives in Biology* 3, 1–13.
- 946 González, J.C., Banerjee, R.V., Huang, S., Sumner, J.S., and Matthews, R.G. (1992).  
947 Comparison of cobalamin-independent and cobalamin-dependent methionine synthases from

- 948 *Escherichia coli*: two solutions to the same chemical problem. *Biochemistry* 31, 6045–6056.
- 949 Gray, M.J., and Escalante-Semerena, J.C. (2007). Single-enzyme conversion of FMNH<sub>2</sub> to 5,6-  
950 dimethylbenzimidazole, the lower ligand of B12. *Proc. Natl. Acad. Sci. U. S. A.* 104, 2921–2926.
- 951 Gray, M.J., Tavares, N.K., and Escalante-Semerena, J.C. (2008). The genome of *Rhodobacter*  
952 *sphaeroides* strain 2.4.1 encodes functional cobinamide salvaging systems of archaeal and  
953 bacterial origins. *Mol. Microbiol.* 70, 824–836.
- 954 Grice, E.A., and Segre, J.A. (2011). The skin microbiome. *Nat. Rev. Microbiol.* 9, 244–253.
- 955 Grice, E.A., Kong, H.H., Conlan, S., Deming, C.B., Davis, J., Young, A.C., NISC Comparative  
956 Sequencing Program, Bouffard, G.G., Blakesley, R.W., Murray, P.R., et al. (2009).  
957 Topographical and temporal diversity of the human skin microbiome. *Science* 324, 1190–1192.
- 958 Hakozaki, T., Date, A., Yoshii, T., Toyokuni, S., Yasui, H., and Sakurai, H. (2008). Visualization  
959 and characterization of UVB-induced reactive oxygen species in a human skin equivalent  
960 model. *Arch. Dermatol. Res.* 300 Suppl 1, S51–S56.
- 961 Hall, J.B., Cong, Z., Imamura-Kawasawa, Y., Kidd, B.A., Dudley, J.T., Thiboutot, D.M., and  
962 Nelson, A.M. (2018). Isolation and Identification of the Follicular Microbiome: Implications for  
963 Acne Research. *J. Invest. Dermatol.* 138, 2033–2040.
- 964 Hannigan, G.D., Meisel, J.S., Tyldsley, A.S., Zheng, Q., Hodkinson, B.P., SanMiguel, A.J.,  
965 Minot, S., Bushman, F.D., and Grice, E.A. (2015). The human skin double-stranded DNA  
966 virome: topographical and temporal diversity, genetic enrichment, and dynamic associations  
967 with the host microbiome. *MBio* 6, e01578–15.
- 968 Hazra, A.B., Tran, J.L.A., Crofts, T.S., and Taga, M.E. (2013). Analysis of substrate specificity in  
969 CobT homologs reveals widespread preference for DMB, the lower axial ligand of vitamin B(12).  
970 *Chem. Biol.* 20, 1275–1285.
- 971 Hondorp, E.R., and Matthews, R.G. (2004). Oxidative stress inactivates cobalamin-independent  
972 methionine synthase (MetE) in *Escherichia coli*. *PLoS Biol.* 2, e336.
- 973 Kalvari, I., Argasinska, J., Quinones-Olvera, N., Nawrocki, E.P., Rivas, E., Eddy, S.R., Bateman,  
974 A., Finn, R.D., and Petrov, A.I. (2018). Rfam 13.0: shifting to a genome-centric resource for non-  
975 coding RNA families. *Nucleic Acids Res.* 46, D335–D342.
- 976 Kang, D., Shi, B., Erfe, M.C., Craft, N., and Li, H. (2015). Vitamin B 12 modulates the  
977 transcriptome of the skin microbiota in acne pathogenesis. *Sci. Transl. Med.* 7, 293ra103–  
978 ra293ra103.
- 979 Kawashima, S., Funakoshi, T., Sato, Y., Saito, N., Ohsawa, H., Kurita, K., Nagata, K., Yoshida,  
980 M., and Ishigami, A. (2018). Protective effect of pre- and post-vitamin C treatments on UVB-  
981 irradiation-induced skin damage. *Sci. Rep.* 8, 16199.
- 982 Kelly, C.J., Alexeev, E.E., Farb, L., Vickery, T.W., Zheng, L., Eric L, C., Kitzenberg, D.A.,  
983 Battista, K.D., Kominsky, D.J., Robertson, C.E., et al. (2019). Oral vitamin B12 supplement is  
984 delivered to the distal gut, altering the corrinoid profile and selectively depleting *Bacteroides* in  
985 C57BL/6 mice. *Gut Microbes* 10, 654–662.
- 986 Kurtz, Z.D., Müller, C.L., Miraldi, E.R., Littman, D.R., Blaser, M.J., and Bonneau, R.A. (2015).

- 987 Sparse and compositionally robust inference of microbial ecological networks. *PLoS Comput.*  
988 *Biol.* 11, e1004226.
- 989 Kurtz, Z.D., Bonneau, R., and Müller, C.L. (2019). Disentangling microbial associations from  
990 hidden environmental and technical factors via latent graphical models.
- 991 Langmead, B., and Salzberg, S.L. (2012). Fast gapped-read alignment with Bowtie 2. *Nat.*  
992 *Methods* 9, 357–359.
- 993 Leichert, L.I., and Jakob, U. (2004). Protein thiol modifications visualized in vivo. *PLoS Biol.* 2,  
994 e333.
- 995 Liebl, W., Klamer, R., and Schleifer, K.-H. (1989). Requirement of chelating compounds for the  
996 growth of *Corynebacterium glutamicum* in synthetic media. *Appl. Microbiol. Biotechnol.* 32, 205–  
997 210.
- 998 Linehan, J.L., Harrison, O.J., Han, S.-J., Byrd, A.L., Vujkovic-Cvijin, I., Villarino, A.V., Sen, S.K.,  
999 Shaik, J., Smelkinson, M., Tamoutounour, S., et al. (2018). Non-classical Immunity Controls  
1000 Microbiota Impact on Skin Immunity and Tissue Repair. *Cell* 172, 784–796.e18.
- 1001 Lu, J., Breitwieser, F.P., Thielen, P., and Salzberg, S.L. (2017). Bracken: Estimating species  
1002 abundance in metagenomics data. *PeerJ Computer Science* 2017, e104.
- 1003 Lu, X., Heal, K.R., Ingalls, A.E., Doxey, A.C., and Neufeld, J.D. (2020). Metagenomic and  
1004 chemical characterization of soil cobalamin production. *ISME J.* 14, 53–66.
- 1005 Ma, S. (2021). MMUPHin: Meta-analysis Methods with Uniform Pipeline for Heterogeneity in  
1006 Microbiome Studies.
- 1007 Magnúsdóttir, S., Ravcheev, D., de Crécy-Lagard, V., and Thiele, I. (2015). Systematic genome  
1008 assessment of B-vitamin biosynthesis suggests co-operation among gut microbes. *Front.*  
1009 *Genet.* 6, 148.
- 1010 McMurdie, P.J., and Holmes, S. (2013). phyloseq: an R package for reproducible interactive  
1011 analysis and graphics of microbiome census data. *PLoS One* 8, e61217.
- 1012 Men, Y., Seth, E.C., Yi, S., Crofts, T.S., Allen, R.H., Taga, M.E., and Alvarez-Cohen, L. (2015).  
1013 Identification of specific corrinoids reveals corrinoid modification in dechlorinating microbial  
1014 communities. *Environ. Microbiol.* 17, 4873–4884.
- 1015 Men, Y., Yu, K., Bælum, J., Gao, Y., Tremblay, J., Prestat, E., Stenuit, B., Tringe, S.G.,  
1016 Jansson, J., Zhang, T., et al. (2017). Metagenomic and Metatranscriptomic Analyses Reveal the  
1017 Structure and Dynamics of a Dechlorinating Community Containing *Dehalococcoides mccartyi*  
1018 and Corrinoid-Providing Microorganisms under Cobalamin-Limited Conditions. *Appl. Environ.*  
1019 *Microbiol.* 83.
- 1020 Nahvi, A., Barrick, J.E., and Breaker, R.R. (2004). Coenzyme B12 riboswitches are widespread  
1021 genetic control elements in prokaryotes. *Nucleic Acids Res.* 32, 143–150.
- 1022 Naik, S., Bouladoux, N., Wilhelm, C., Molloy, M.J., Salcedo, R., Kastenmuller, W., Deming, C.,  
1023 Quinones, M., Koo, L., Conlan, S., et al. (2012). Compartmentalized control of skin immunity by  
1024 resident commensals. *Science* 337, 1115–1119.

- 1025 Nakatsuji, T., Chen, T.H., Narala, S., Chun, K.A., Two, A.M., Yun, T., Shafiq, F., Kotol, P.F.,  
1026 Bouslimani, A., Melnik, A.V., et al. (2017). Antimicrobials from human skin commensal bacteria  
1027 protect against *Staphylococcus aureus* and are deficient in atopic dermatitis. *Sci. Transl. Med.*  
1028 9.
- 1029 Nawrocki, E.P., and Eddy, S.R. (2013). Infernal 1.1: 100-fold faster RNA homology searches.  
1030 *BIOINFORMATICS APPLICATIONS* 29, 2933–2935.
- 1031 Oh, J., Byrd, A.L., Deming, C., Conlan, S., NISC Comparative Sequencing Program, Kong,  
1032 H.H., and Segre, J.A. (2014). Biogeography and individuality shape function in the human skin  
1033 metagenome. *Nature* 514, 59–64.
- 1034 Oh, J., Byrd, A.L., Park, M., Kong, H.H., and Segre, J.A. (2016). Temporal Stability of the  
1035 Human Skin Microbiome. *Cell* 165, 854–866.
- 1036 O’Sullivan, J.N., Rea, M.C., O’Connor, P.M., Hill, C., and Ross, R.P. (2019). Human skin  
1037 microbiota is a rich source of bacteriocin-producing staphylococci that kill human pathogens.  
1038 *FEMS Microbiol. Ecol.* 95.
- 1039 Paller, A.S., Kong, H.H., Seed, P., Naik, S., Scharschmidt, T.C., Gallo, R.L., Luger, T., and  
1040 Irvine, A.D. (2019). The microbiome in patients with atopic dermatitis. *J. Allergy Clin. Immunol.*  
1041 143, 26–35.
- 1042 Piwowarek, K., Lipińska, E., Hać-Szymańczuk, E., Kieliszek, M., and Ścibisz, I. (2018).  
1043 *Propionibacterium* spp.—source of propionic acid, vitamin B12, and other metabolites important  
1044 for the industry. *Applied Microbiology and Biotechnology* 102, 515–538.
- 1045 Polaski, J.T., Webster, S.M., Johnson, J.E., and Batey, R.T. (2017). Cobalamin riboswitches  
1046 exhibit a broad range of ability to discriminate between methylcobalamin and  
1047 adenosylcobalamin. *J. Biol. Chem.* 292, 11650–11658.
- 1048 Price, M.N., Dehal, P.S., and Arkin, A.P. (2010). FastTree 2--approximately maximum-likelihood  
1049 trees for large alignments. *PLoS One* 5, e9490.
- 1050 Pritchard, L., Glover, R.H., Humphris, S., Elphinstone, J.G., and Toth, I.K. (2015). Genomics  
1051 and taxonomy in diagnostics for food security: soft-rotting enterobacterial plant pathogens. *Anal.*  
1052 *Methods* 8, 12–24.
- 1053 Rice, P., Longden, I., and Bleasby, A. (2000). EMBOSS: the European Molecular Biology Open  
1054 Software Suite. *Trends Genet.* 16, 276–277.
- 1055 Rodionov, D.A., Arzamasov, A.A., Khoroshkin, M.S., Iablokov, S.N., Leyn, S.A., Peterson, S.N.,  
1056 Novichkov, P.S., and Osterman, A.L. (2019). Micronutrient Requirements and Sharing  
1057 Capabilities of the Human Gut Microbiome. *Front. Microbiol.* 10, 1316.
- 1058 Romine, M.F., Rodionov, D.A., Maezato, Y., Osterman, A.L., and Nelson, W.C. (2017).  
1059 Underlying mechanisms for syntrophic metabolism of essential enzyme cofactors in microbial  
1060 communities. *ISME J.* 11, 1434–1446.
- 1061 Scharschmidt, T.C., and Fischbach, M.A. (2013). What Lives On Our Skin: Ecology, Genomics  
1062 and Therapeutic Opportunities Of the Skin Microbiome. *Drug Discov. Today Dis. Mech.* 10.
- 1063 Scharschmidt, T.C., Vasquez, K.S., Pauli, M.L., Leitner, E.G., Chu, K., Truong, H.A., Lowe,

- 1064 M.M., Sanchez Rodriguez, R., Ali, N., Laszik, Z.G., et al. (2017). Commensal Microbes and Hair  
1065 Follicle Morphogenesis Coordinately Drive Treg Migration into Neonatal Skin. *Cell Host*  
1066 *Microbe*.
- 1067 Shaiber, A., Willis, A.D., Delmont, T.O., Roux, S., Chen, L.-X., Schmid, A.C., Yousef, M.,  
1068 Watson, A.R., Lolans, K., Esen, Ö.C., et al. (2020). Functional and genetic markers of niche  
1069 partitioning among enigmatic members of the human oral microbiome. *Genome Biol.* *21*, 292.
- 1070 Shelton, A.N., Seth, E.C., Mok, K.C., Han, A.W., Jackson, S.N., Haft, D.R., and Taga, M.E.  
1071 (2019). Uneven distribution of cobamide biosynthesis and dependence in bacteria predicted by  
1072 comparative genomics. *ISME J.* *13*, 789–804.
- 1073 Sokolovskaya, O.M., Mok, K.C., Park, J.D., Tran, J.L.A., Quanstrom, K.A., and Taga, M.E.  
1074 (2019). Cofactor Selectivity in Methylmalonyl Coenzyme A Mutase, a Model Cobamide-  
1075 Dependent Enzyme. *MBio* *10*.
- 1076 Sokolovskaya, O.M., Shelton, A.N., and Taga, M.E. (2020). Sharing vitamins: Cobamides unveil  
1077 microbial interactions. *Science* *369*, eaba0165.
- 1078 Sun, E.I., Leyn, S.A., Kazanov, M.D., Saier, M.H., Jr, Novichkov, P.S., and Rodionov, D.A.  
1079 (2013). Comparative genomics of metabolic capacities of regulons controlled by cis-regulatory  
1080 RNA motifs in bacteria. *BMC Genomics* *14*, 597.
- 1081 Taga, M.E., Larsen, N.A., Howard-Jones, A.R., Walsh, C.T., and Walker, G.C. (2007). BluB  
1082 cannibalizes flavin to form the lower ligand of vitamin B12. *Nature* *446*, 449–453.
- 1083 Uberoi, A., Bartow-McKenney, C., Zheng, Q., Flowers, L., Campbell, A., Knight, S.A.B., Chan,  
1084 N., Wei, M., Lovins, V., Bugayev, J., et al. (2021). Commensal microbiota regulates skin barrier  
1085 function and repair via signaling through the aryl hydrocarbon receptor. *Cell Host Microbe*.
- 1086 Wanke, I., Steffen, H., Christ, C., Krismer, B., Götz, F., Peschel, A., Schaller, M., and Schittek,  
1087 B. (2011). Skin commensals amplify the innate immune response to pathogens by activation of  
1088 distinct signaling pathways. *J. Invest. Dermatol.* *131*, 382–390.
- 1089 Williams, H.C. (2005). Clinical practice. Atopic dermatitis. *N. Engl. J. Med.* *352*, 2314–2324.
- 1090 Wollenberg, M.S., Claesen, J., Escapa, I.F., Aldridge, K.L., Fischbach, M.A., and Lemon, K.P.  
1091 (2014). Propionibacterium-produced coproporphyrin III induces *Staphylococcus aureus*  
1092 aggregation and biofilm formation. *MBio* *5*, e01286–14.
- 1093 Wood, D.E., Lu, J., and Langmead, B. (2019). Improved metagenomic analysis with Kraken 2.  
1094 *Genome Biol.* *20*, 257.
- 1095 Xu, Y., Xiang, S., Ye, K., Zheng, Y., Feng, X., Zhu, X., Chen, J., and Chen, Y. (2018).  
1096 Cobalamin (Vitamin B12) Induced a Shift in Microbial Composition and Metabolic Activity in an  
1097 in vitro Colon Simulation. *Front. Microbiol.* *9*, 2780.
- 1098 Yin, T., Cook, D., and Lawrence, M. (2012). ggbio: an R package for extending the grammar of  
1099 graphics for genomic data. *Genome Biol.* *13*, R77.
- 1100 Yu, G., Smith, D.K., Zhu, H., Guan, Y., and Lam, T.T. (2017). ggtree : an r package for  
1101 visualization and annotation of phylogenetic trees with their covariates and other associated  
1102 data. *Methods Ecol. Evol.* *8*, 28–36.



1103 Zhu, X., Xiang, S., Feng, X., Wang, H., Tian, S., Xu, Y., Shi, L., Yang, L., Li, M., Shen, Y., et al.  
1104 (2019). Impact of Cyanocobalamin and Methylcobalamin on Inflammatory Bowel Disease and  
1105 the Intestinal Microbiota Composition. *J. Agric. Food Chem.* 67, 916–926.

1106

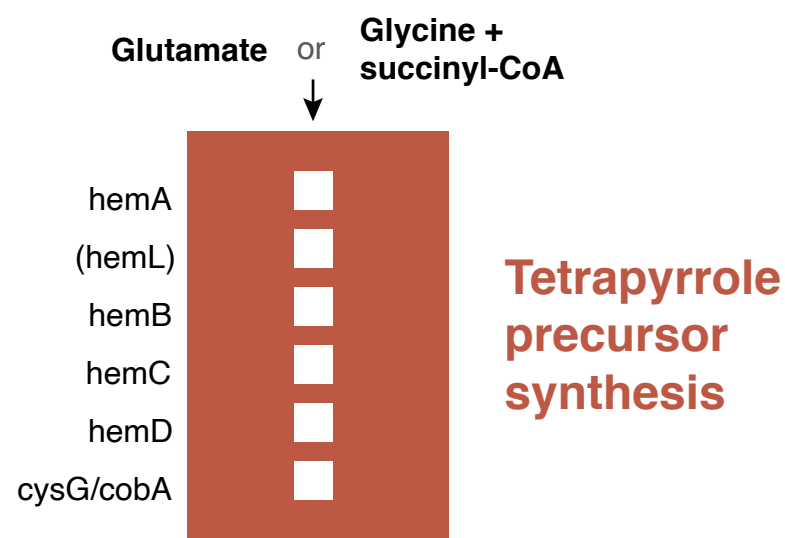

bioRxiv preprint doi: <https://doi.org/10.1101/2020.12.02.407395>; this version posted November 10, 2021. The copyright holder for this preprint (which was not certified by peer review) is the author/funder, who has granted bioRxiv a license to display the preprint in perpetuity. It is made available under a [CC-BY 4.0 International license](https://creativecommons.org/licenses/by/4.0/).

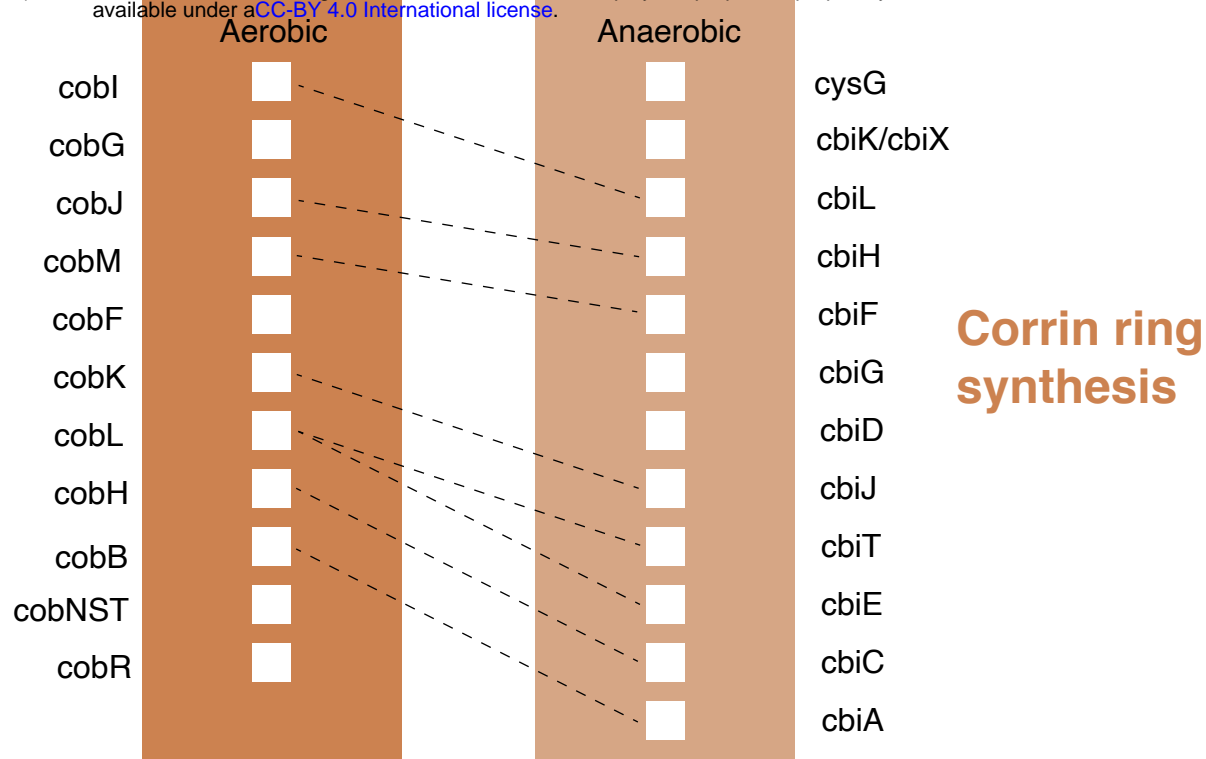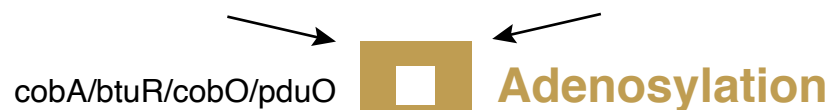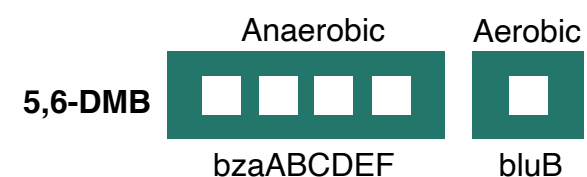

Phenolics and purines

**Lower ligand synthesis**

**Corrinoid remodeling**

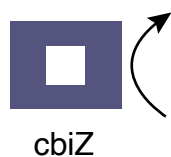

**Nucleotide loop assembly**

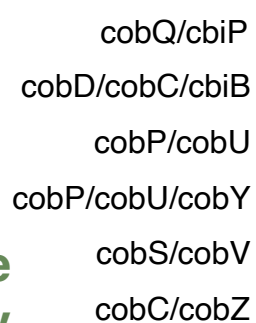

**Complete cobamide**

**Figure 1. Simplified de novo cobamide biosynthesis pathway.** Subsections of the pathway are indicated by color, with gene names and white boxes indicating each enzymatic step. Aerobic and anaerobic corrin ring synthesis pathways contain orthologous enzymes that are indicated with dashed lines. HemL in parentheses is required for synthesis from glutamate.

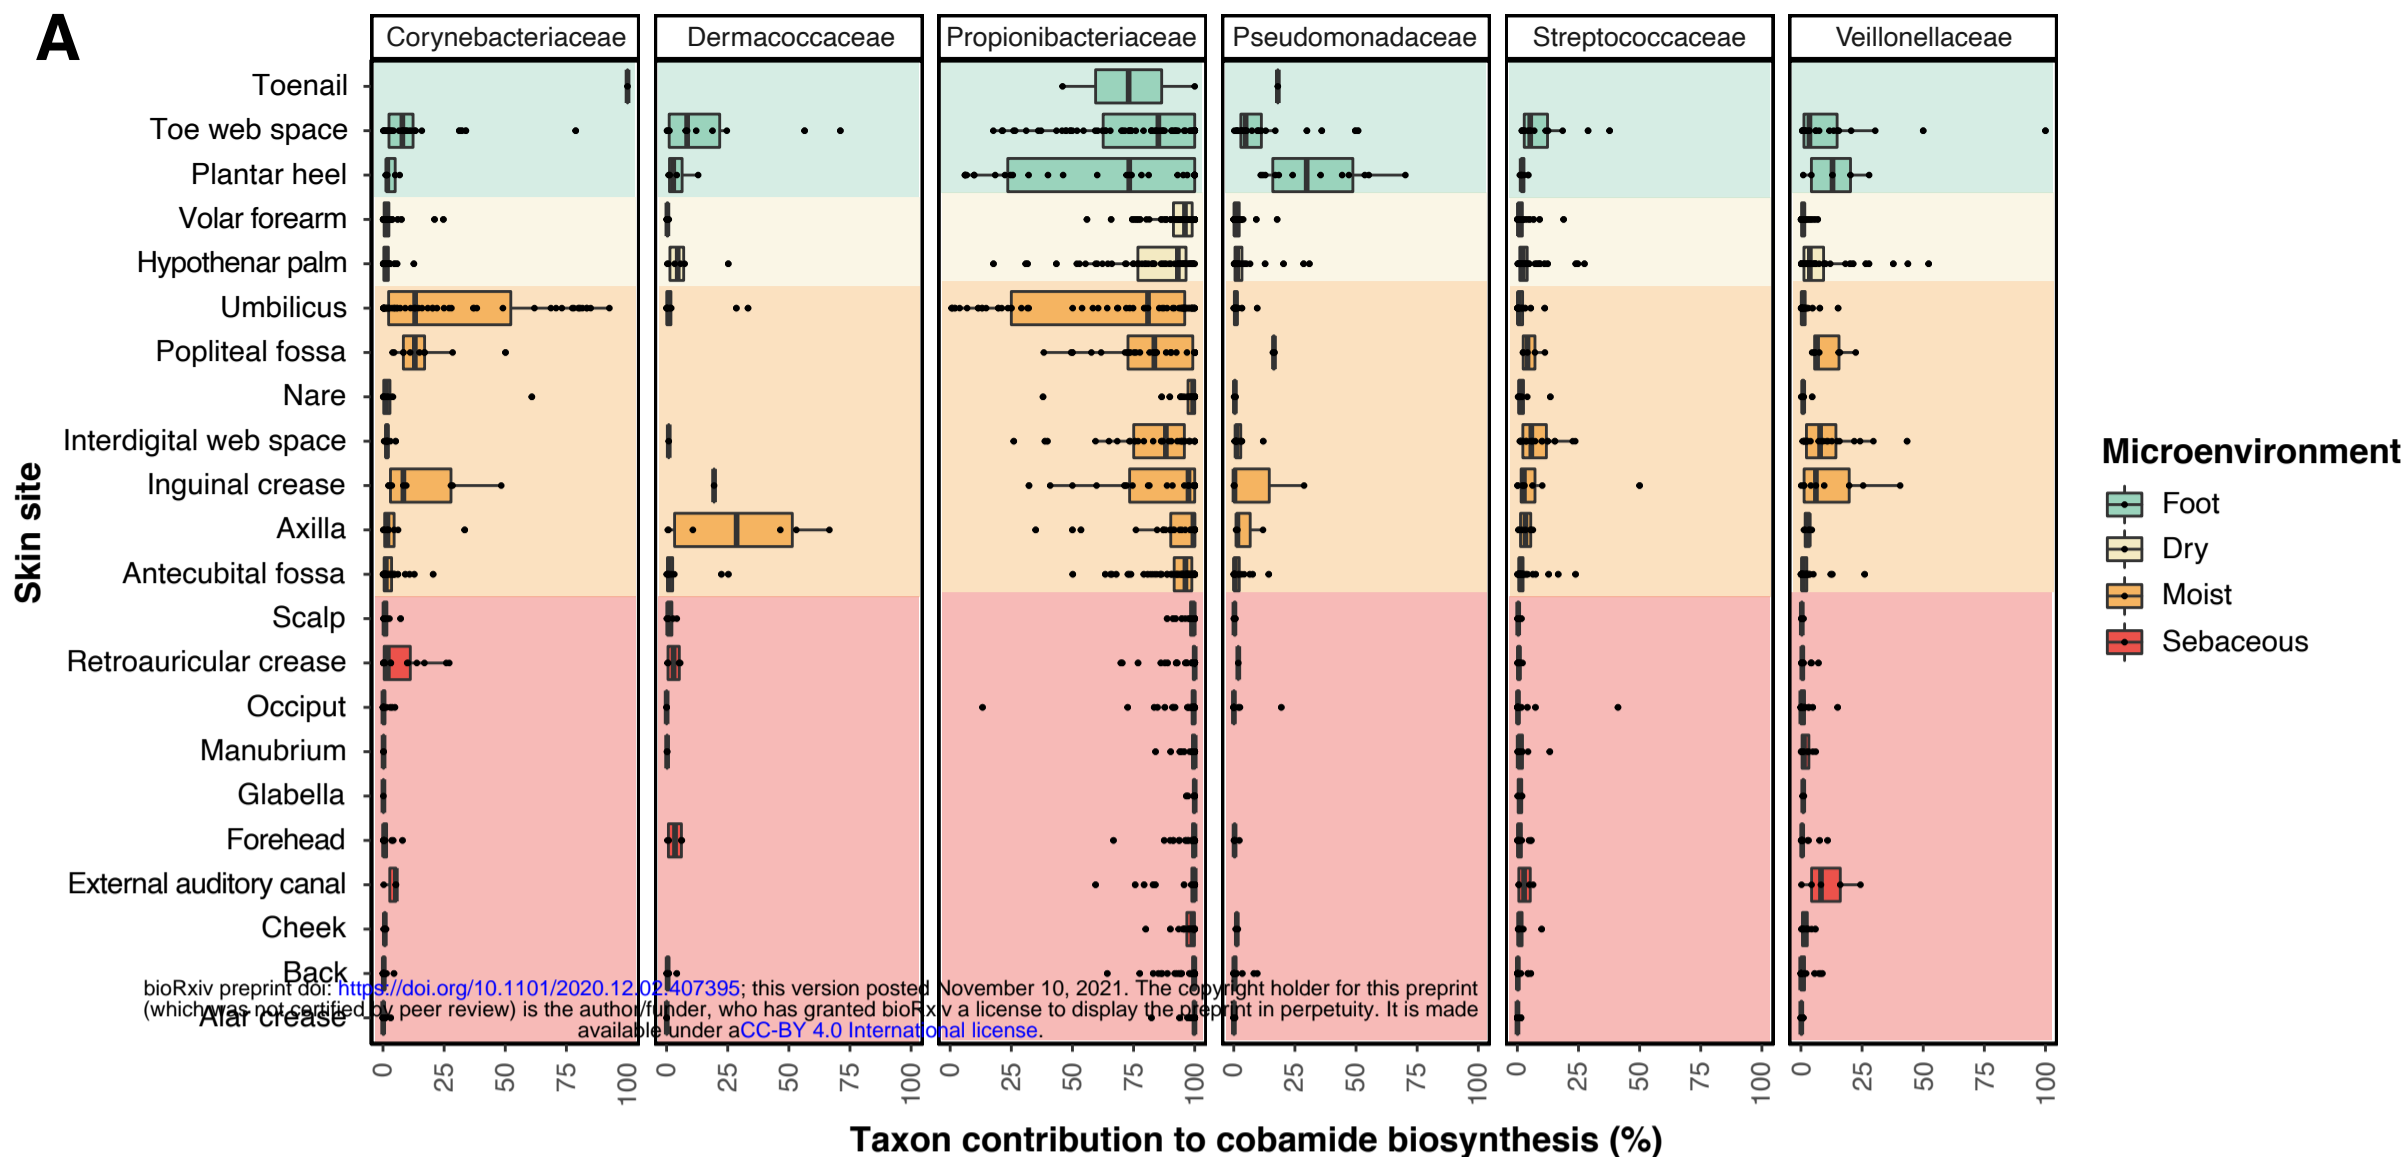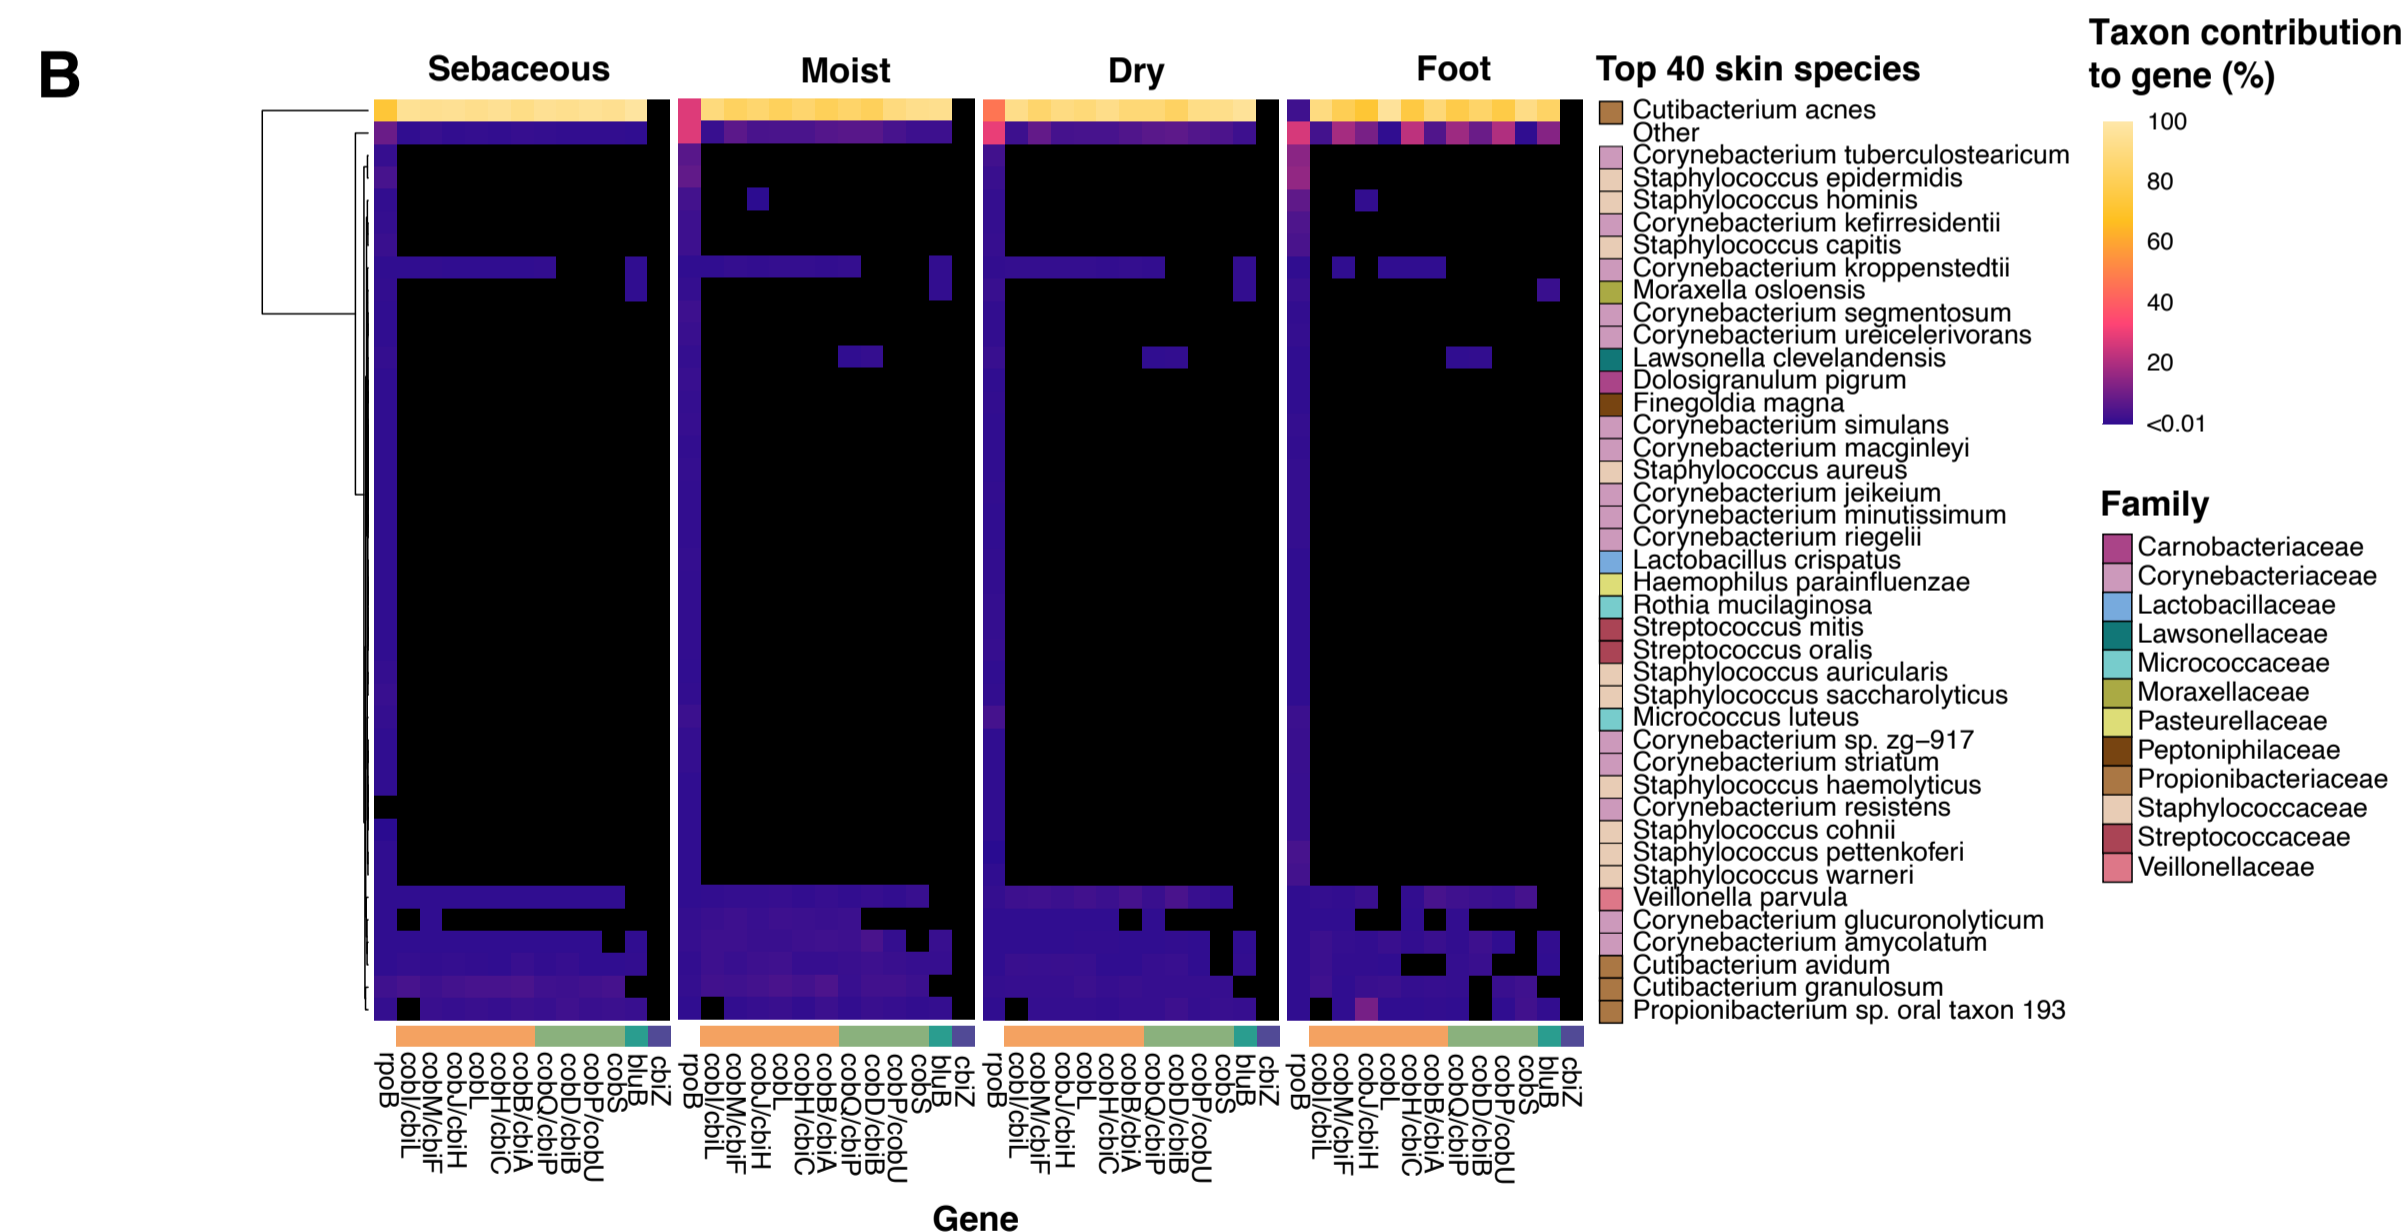

**Figure 2. De novo cobamide biosynthesis is limited to distinct taxa on the skin.** A) Taxon contribution reflects the proportion of normalized cobamide biosynthesis gene hits assigned to each taxon out of the total normalized cobamide biosynthesis gene hits within a sample. Normalization was performed by dividing hits to each gene by its profile HMM length. Taxon contributions are shown for the top 6 taxa, grouped by skin site. Color indicates microenvironment classification. B) The top 40 most abundant bacterial species within the dataset were determined by totaling the hits to single copy gene *rpoB* for each species. The remaining species were grouped into “Other”. Individual values in the heatmap represent the number of hits assigned to the species for a particular cobamide biosynthesis gene divided by the total number of hits to the gene. Gene hits were normalized by profile HMM length and sequencing depth prior to calculation. Black squares represent taxonomic abundance from 0 to 0.01%. The colored bar above cobamide biosynthesis genes indicates pathway subsection from Figure 1.

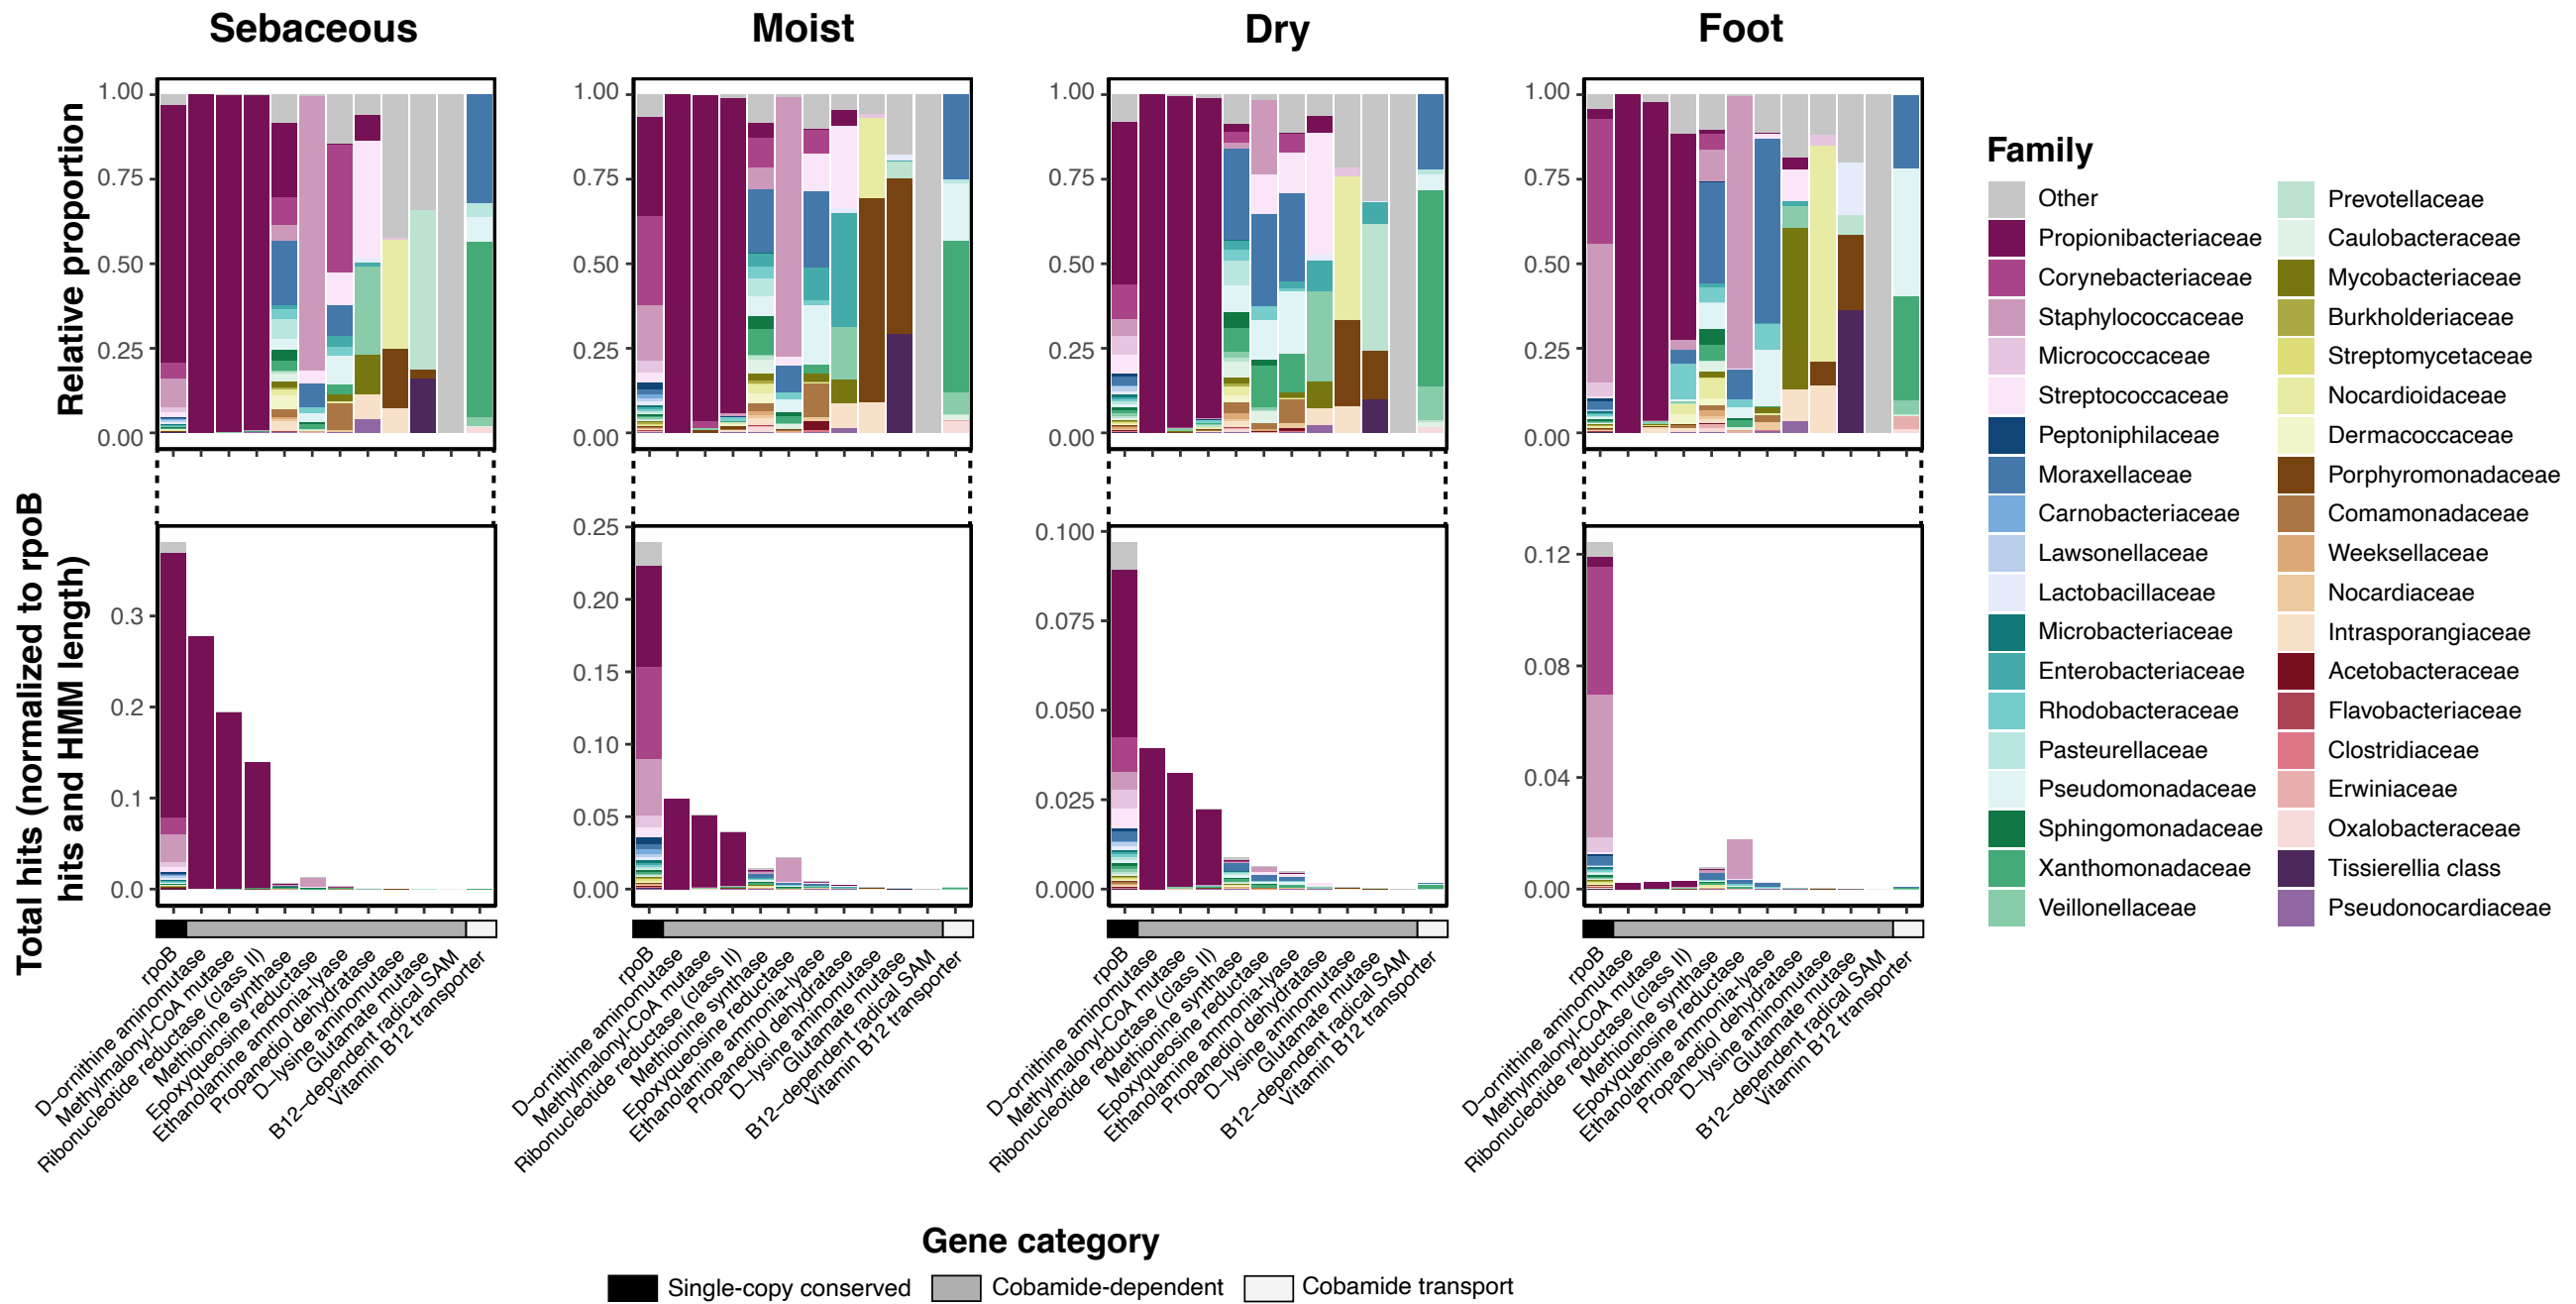

**Figure 3. Phylogenetically diverse skin bacteria encode for cobamide dependent enzymes and transporters.** The total normalized hits for cobamide-dependent enzymes, cobamide transport protein *btuB*, and SCG *rpoB* are shown (total hits normalized to profile HMM coverage and sequence depth), with the taxonomic abundance of the hits expanded as relative proportions above. Hits to distinct B12-dependent radical SAM proteins are grouped together as “B12-dep radical SAM”.

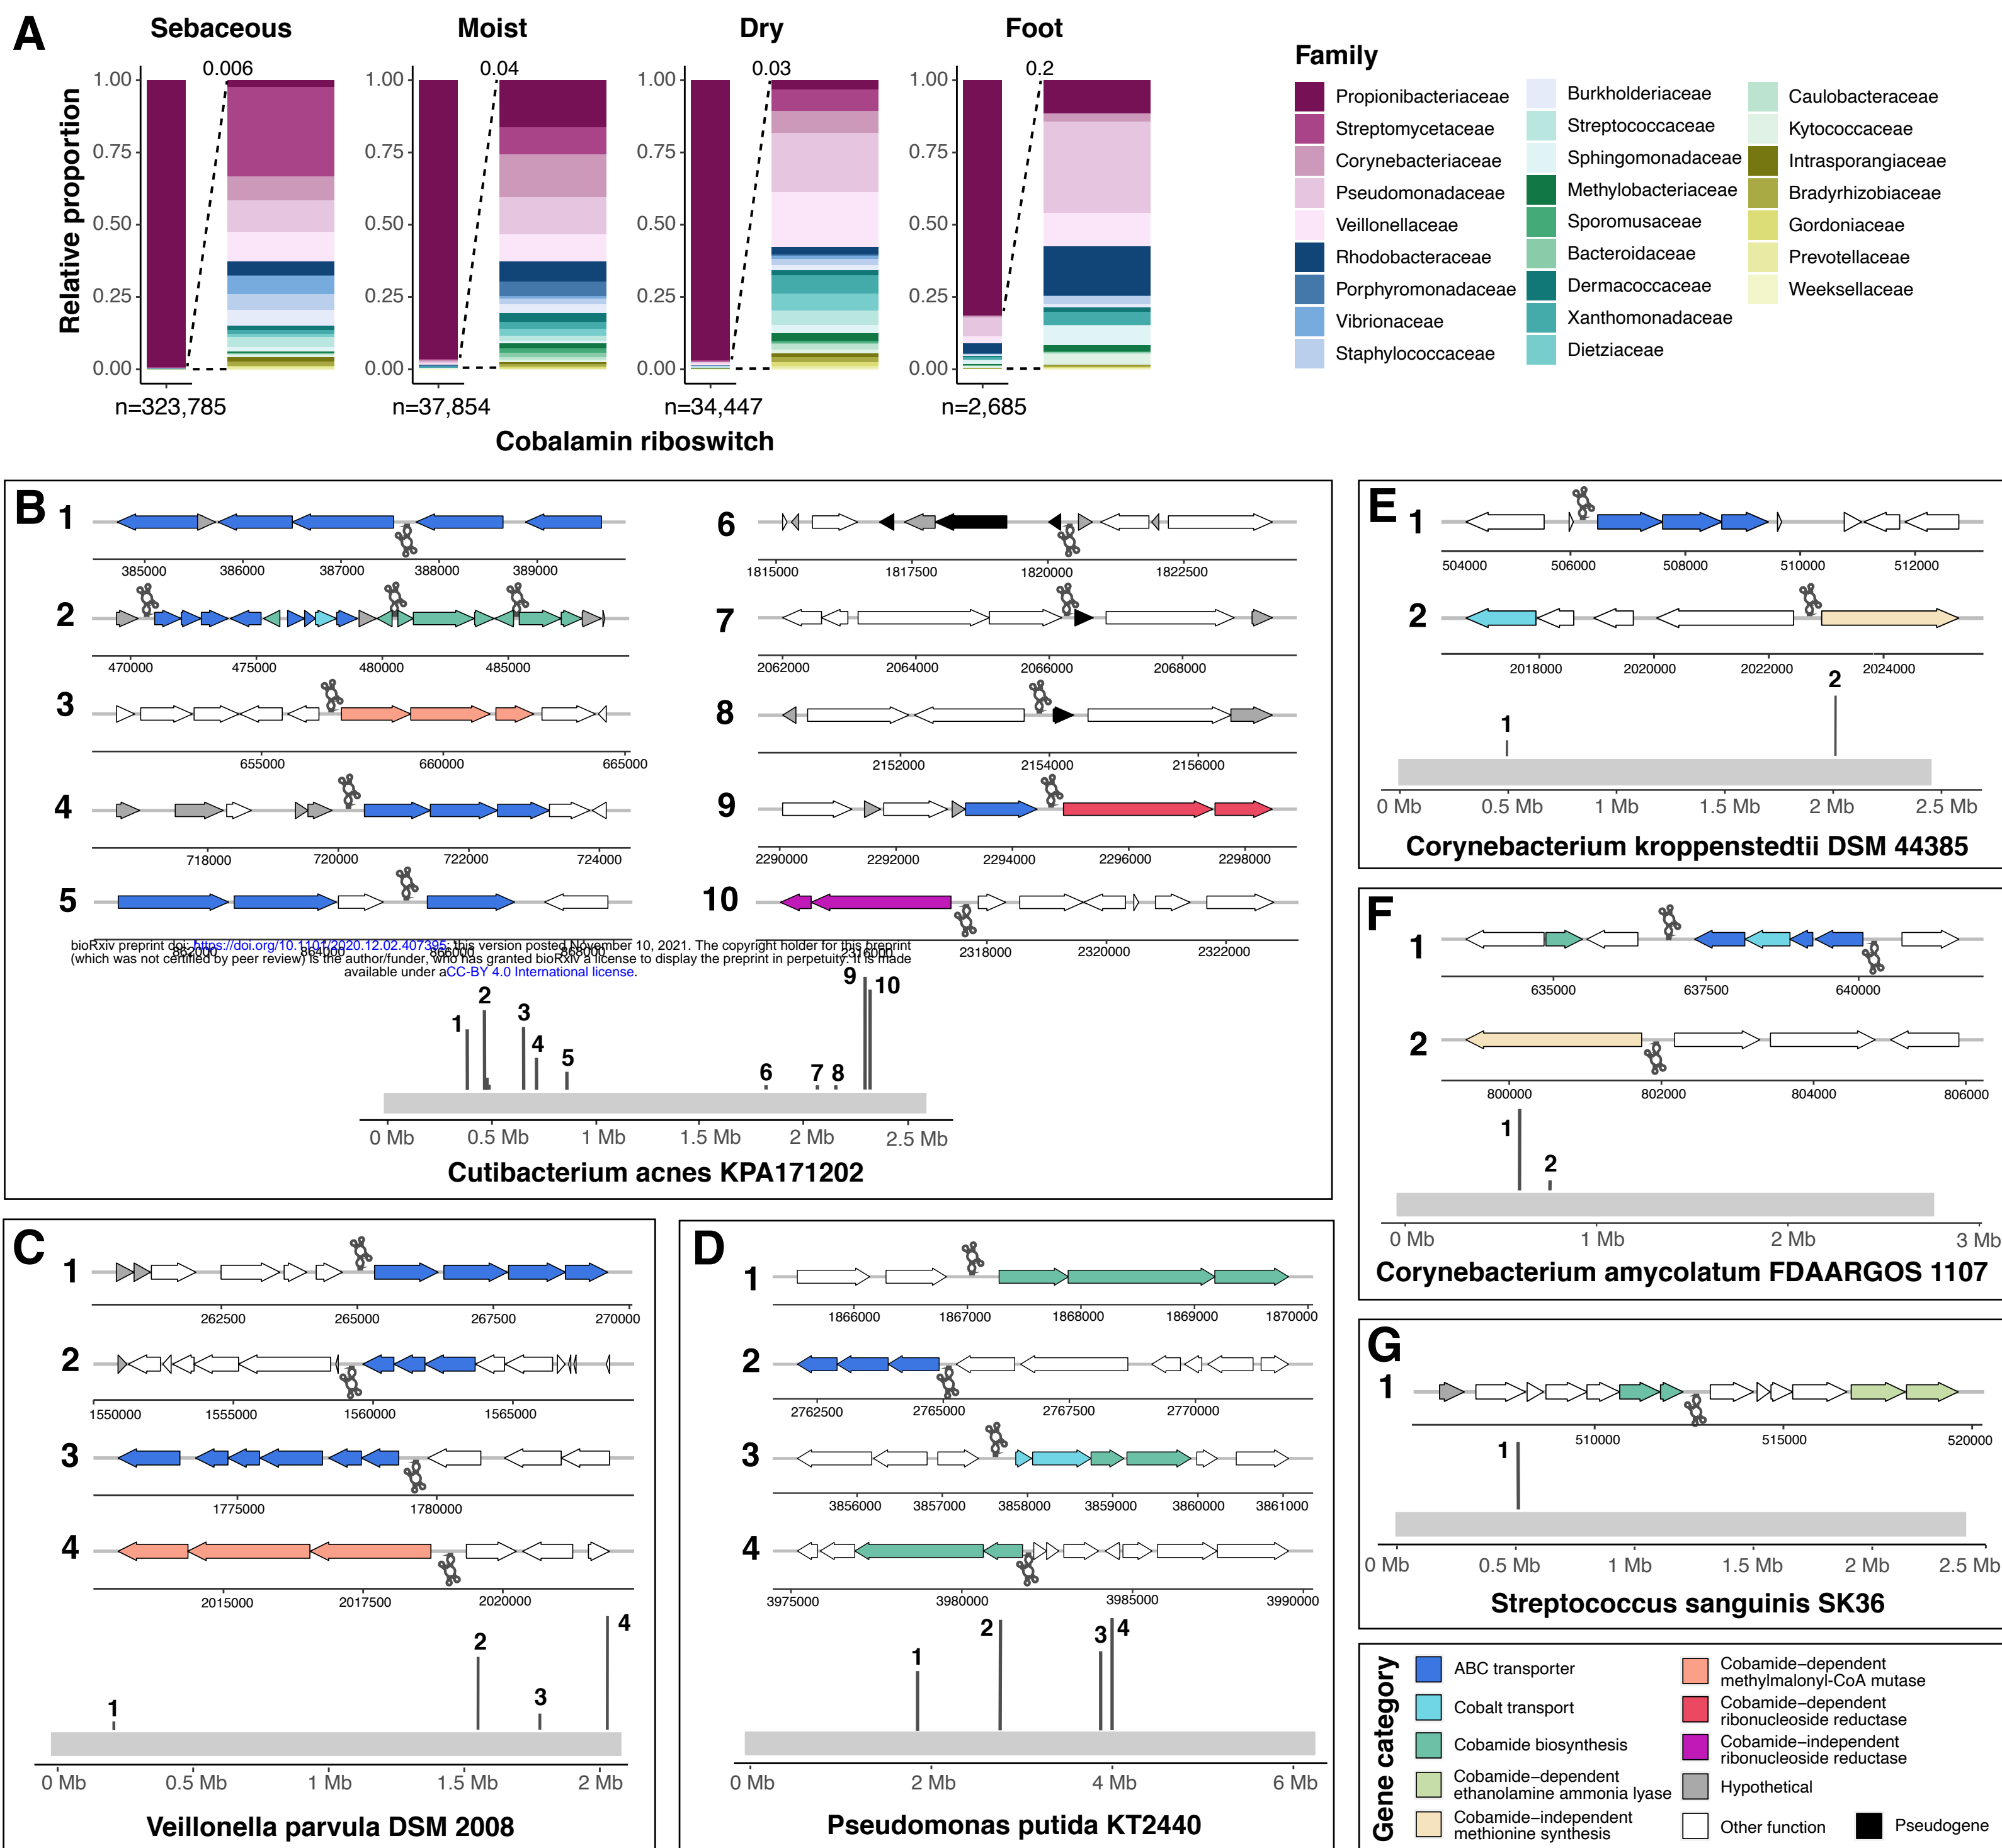

**Figure 4. Cobalamin riboswitch regulation varies across skin taxa.** A) The taxonomic abundance of hits for cobalamin riboswitches (Rfam clan CL00101) are shown, with an expanded view of low abundance hits to the right. Total cobalamin riboswitch hits within each microenvironment are indicated. Cobalamin riboswitch-containing reads identified from INFERNAL analysis were aligned to B) *Cutibacterium acnes* KPA171202, C) *Veillonella parvula* DSM 2008, D) *Pseudomonas putida* KT2440, E) *Corynebacterium kroppenstedtii* DSM 44385, F) *Corynebacterium amycolatum* FDAARGOS 1107, and G) *Streptococcus sanguinis* SK36 genomes. Dark gray lines along the light grey genome track indicate the position of mapped INFERNAL hits within the genome. Genes upstream and downstream of the riboswitches are colored by their general functional annotation. White (other function) indicates genes not currently known to be associated with cobamides. Grey (hypothetical) indicates a hypothetical protein that has no functional annotation. Right-facing gene arrows and upright dark gray riboswitch icons indicate forward strand orientation, and left-facing gene arrows and inverted riboswitch icons indicate reverse strand orientation. Genomic regions are not to scale.

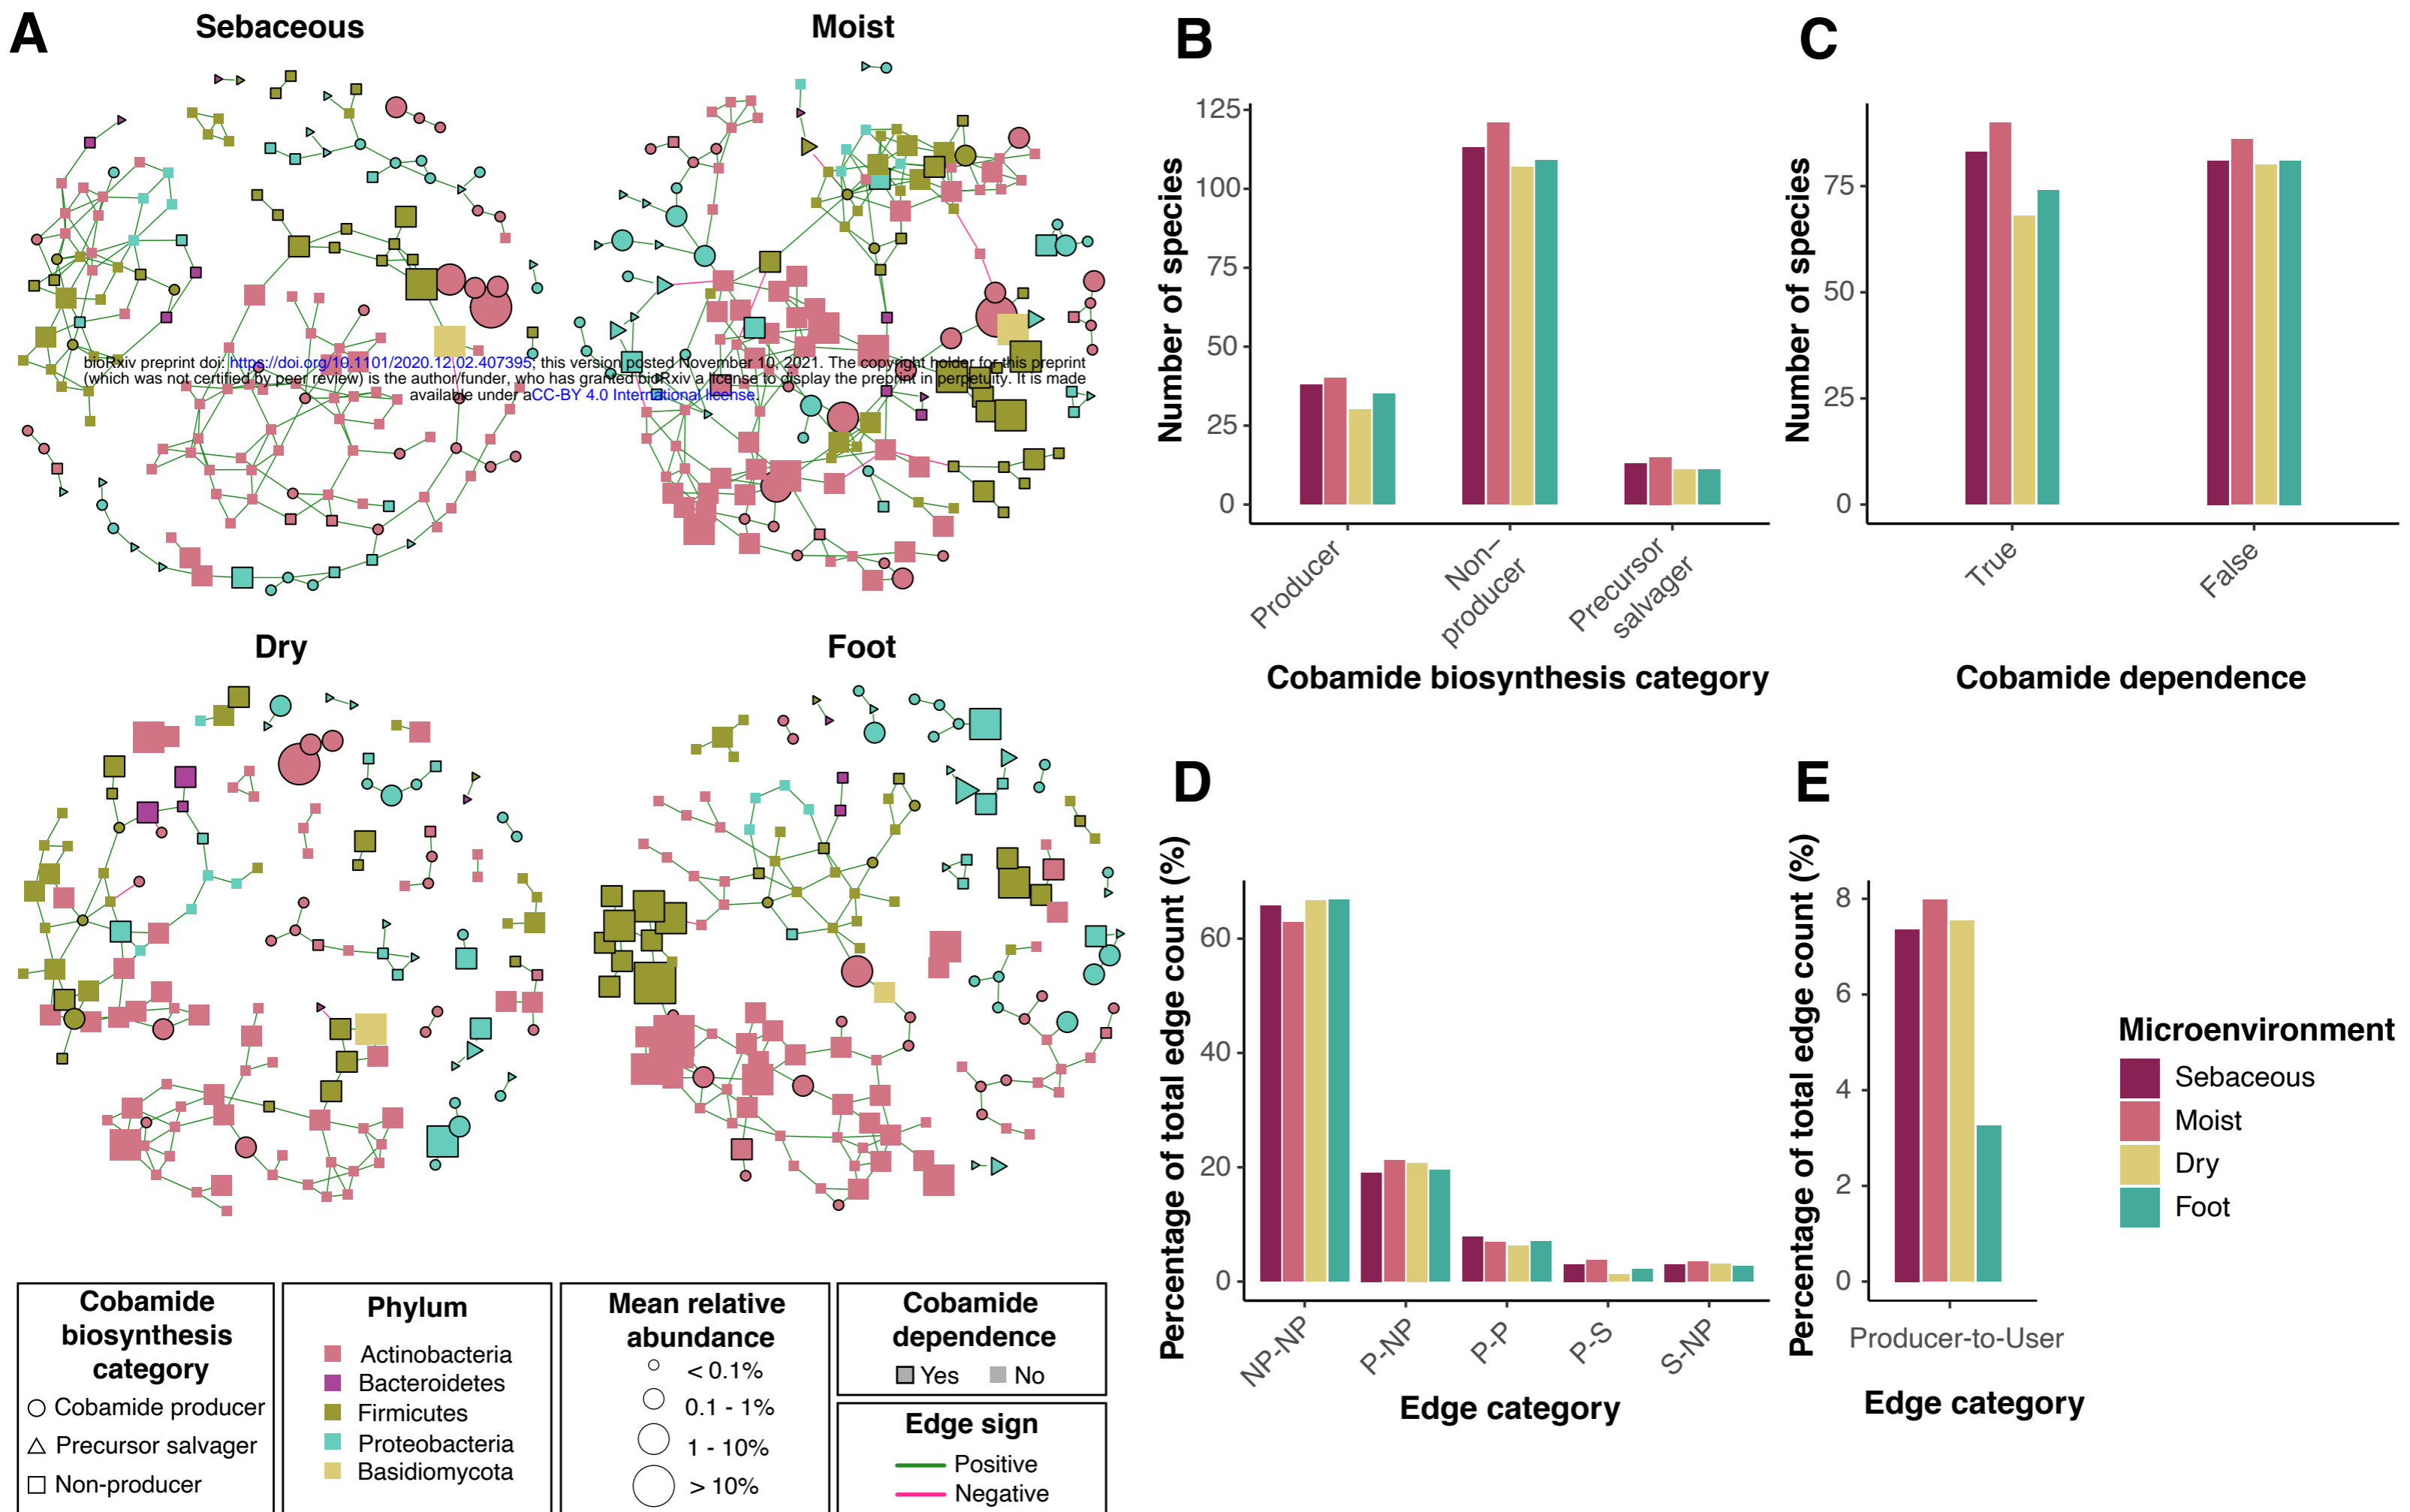

**Figure 5. Skin microbiome networks reveal microbial associations among cobamide producers, precursor salvagers, and users.** A) The SPIEC-EASI method was used to identify microbial associations within each microenvironment of three independent skin microbiome datasets. Consensus networks are shown, representing associations identified in at least 2 of the 3 datasets. Species are represented by nodes and colored by phylum. Green and pink edges represent positive and negative associations, respectively. Node shape represents cobamide biosynthesis category and node size reflects mean species relative abundance within each microenvironment. Cobamide dependent species are outlined in black. In each final network, B) the number of species classified to each cobamide biosynthesis category, C) the number of species that are cobamide dependent or independent, D) the percentage of total edges that fall into each cobamide biosynthesis edge category, and E) the percentage of total edges that exist between cobamide producers and cobamide dependent species that are non-producers or precursor salvagers is shown. NP=Non-producer, P=Producer, S=Precursor salvager.

A

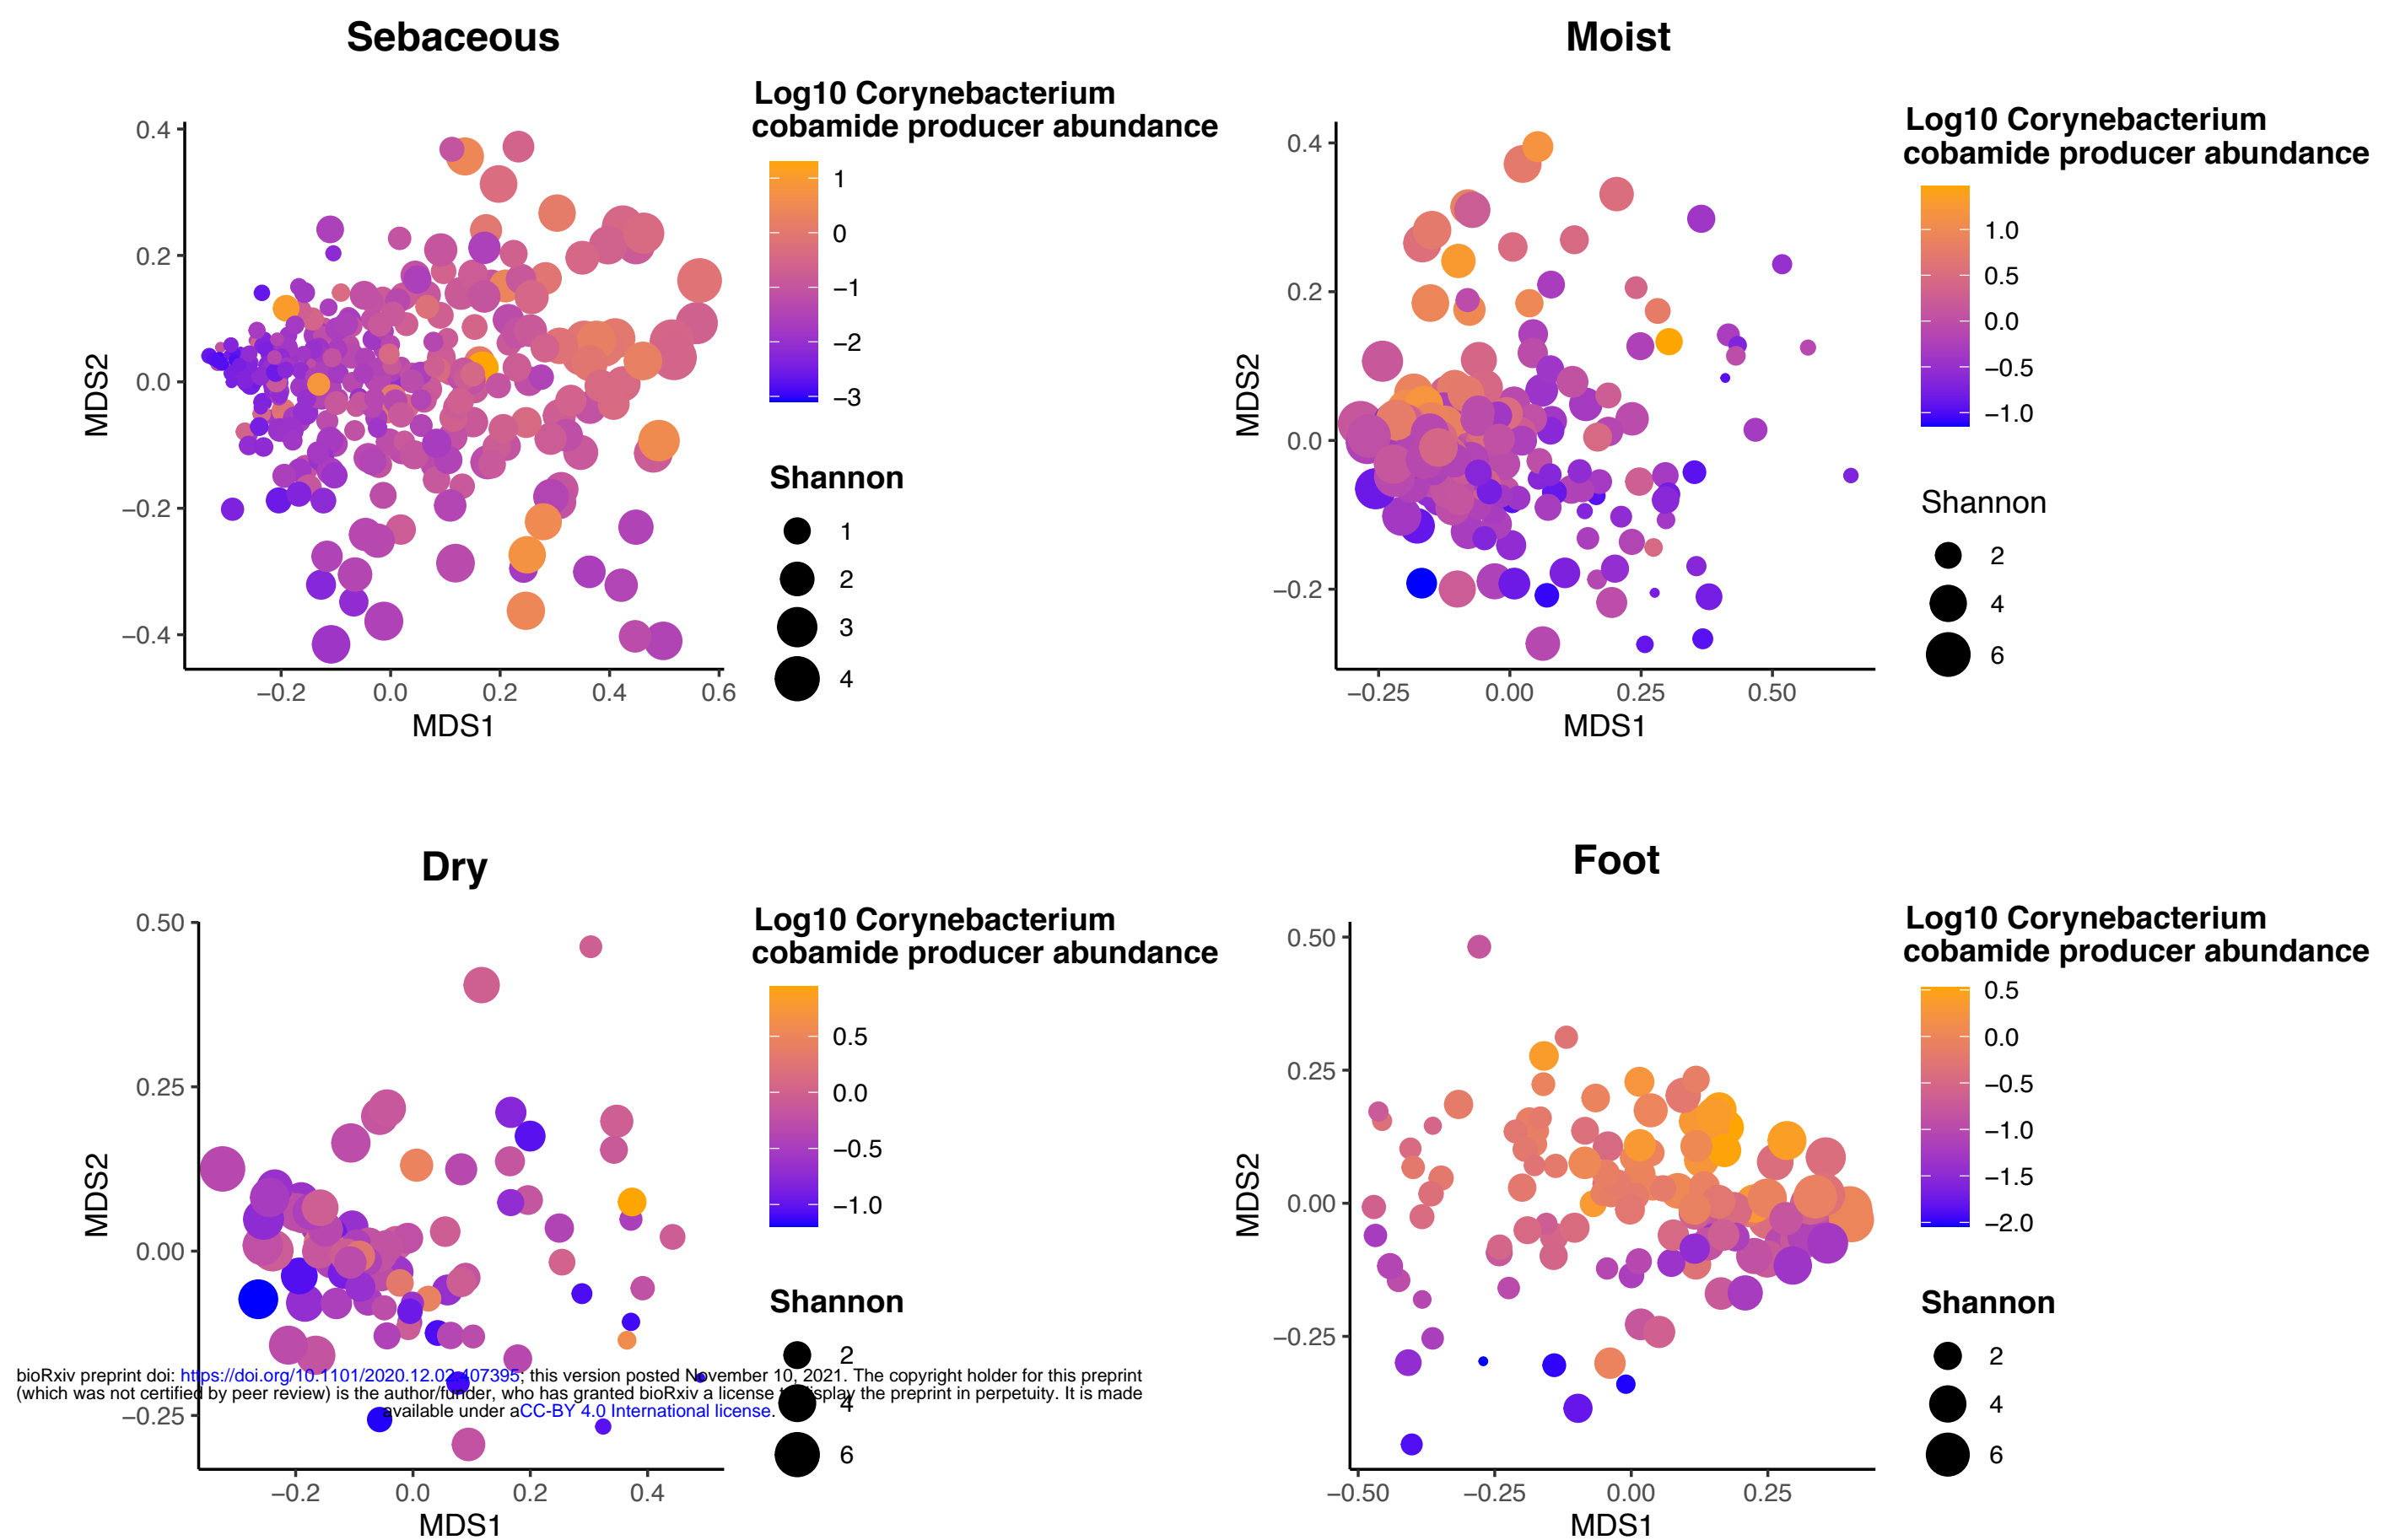

B

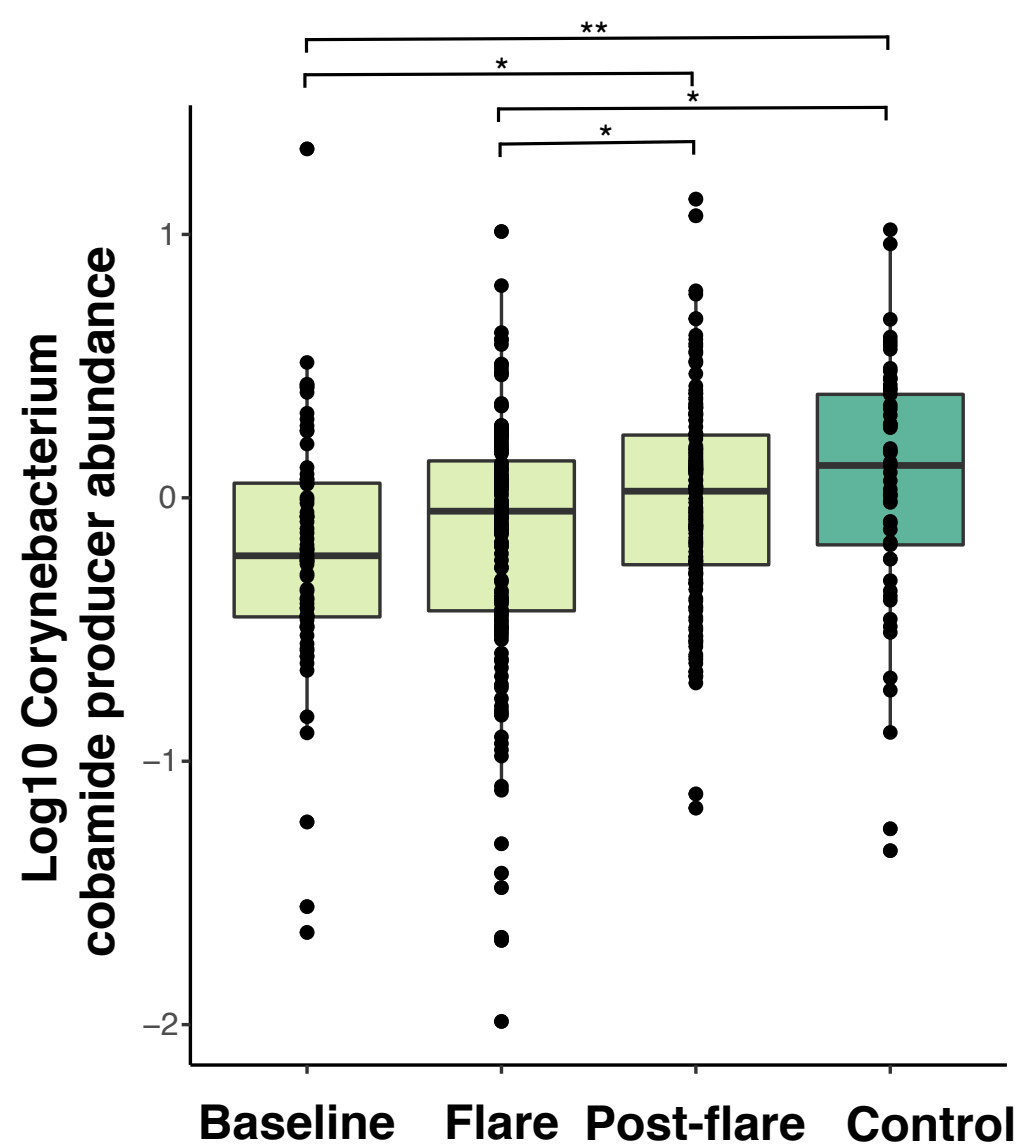

C

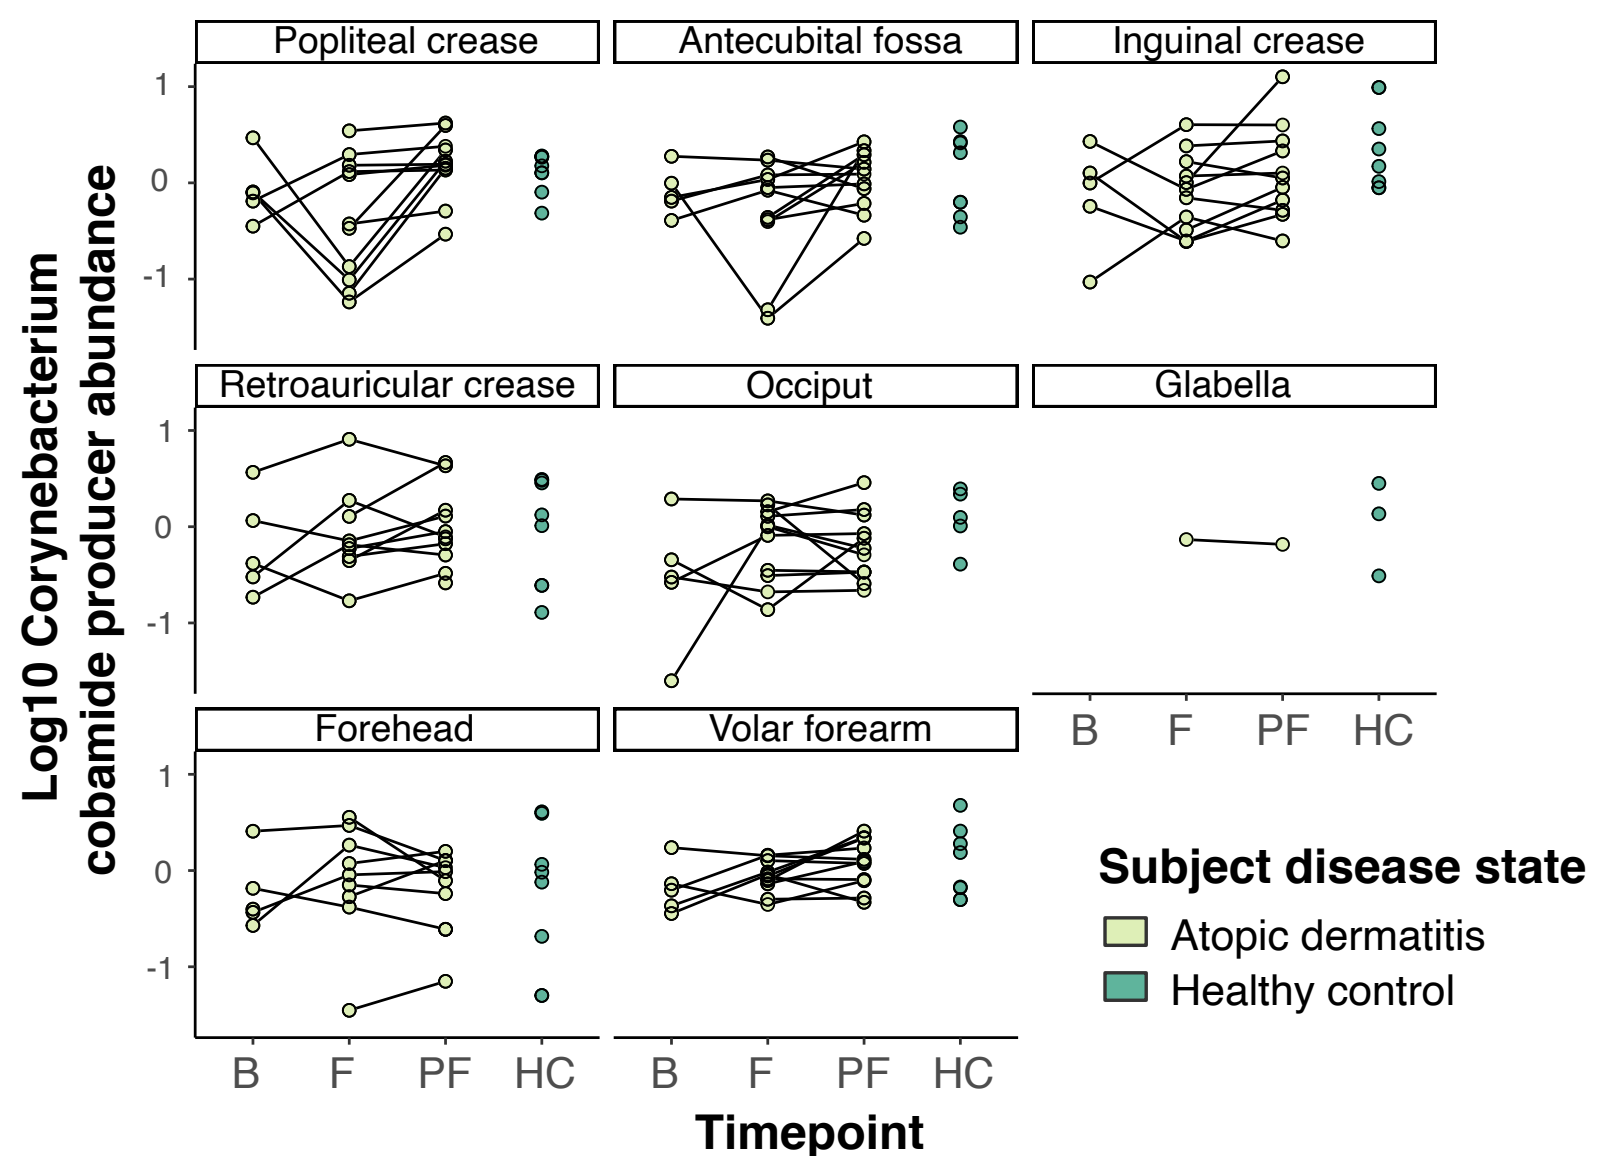

**Figure 6. Cobamide-producing Corynebacterium abundance is associated with microbiome diversity and atopic dermatitis disease state.** Within each metagenome, the cumulative relative abundance of cobamide-producing Corynebacteria (CPC) was calculated. A) NMDS plots based on Bray-Curtis indices for healthy adult samples within each skin microenvironment are shown. Points are colored by Corynebacterium cobamide producer relative abundance and sized by alpha diversity (Shannon). B) The relative abundance of CPC in pediatric atopic dermatitis patients at baseline, flare, and post-flare timepoints or in healthy control subjects. A pairwise Wilcoxon rank sum test was performed among each group with FDR correction ( $* < 0.05$ ,  $** < 0.01$ ) (C) The relative abundance of CPC in each individual skin site sampled. Black lines connect timepoints for a given patient. Certain sites were sampled from both sides of the body, therefore each point represents the average abundance of for each individual at the specified skin site.

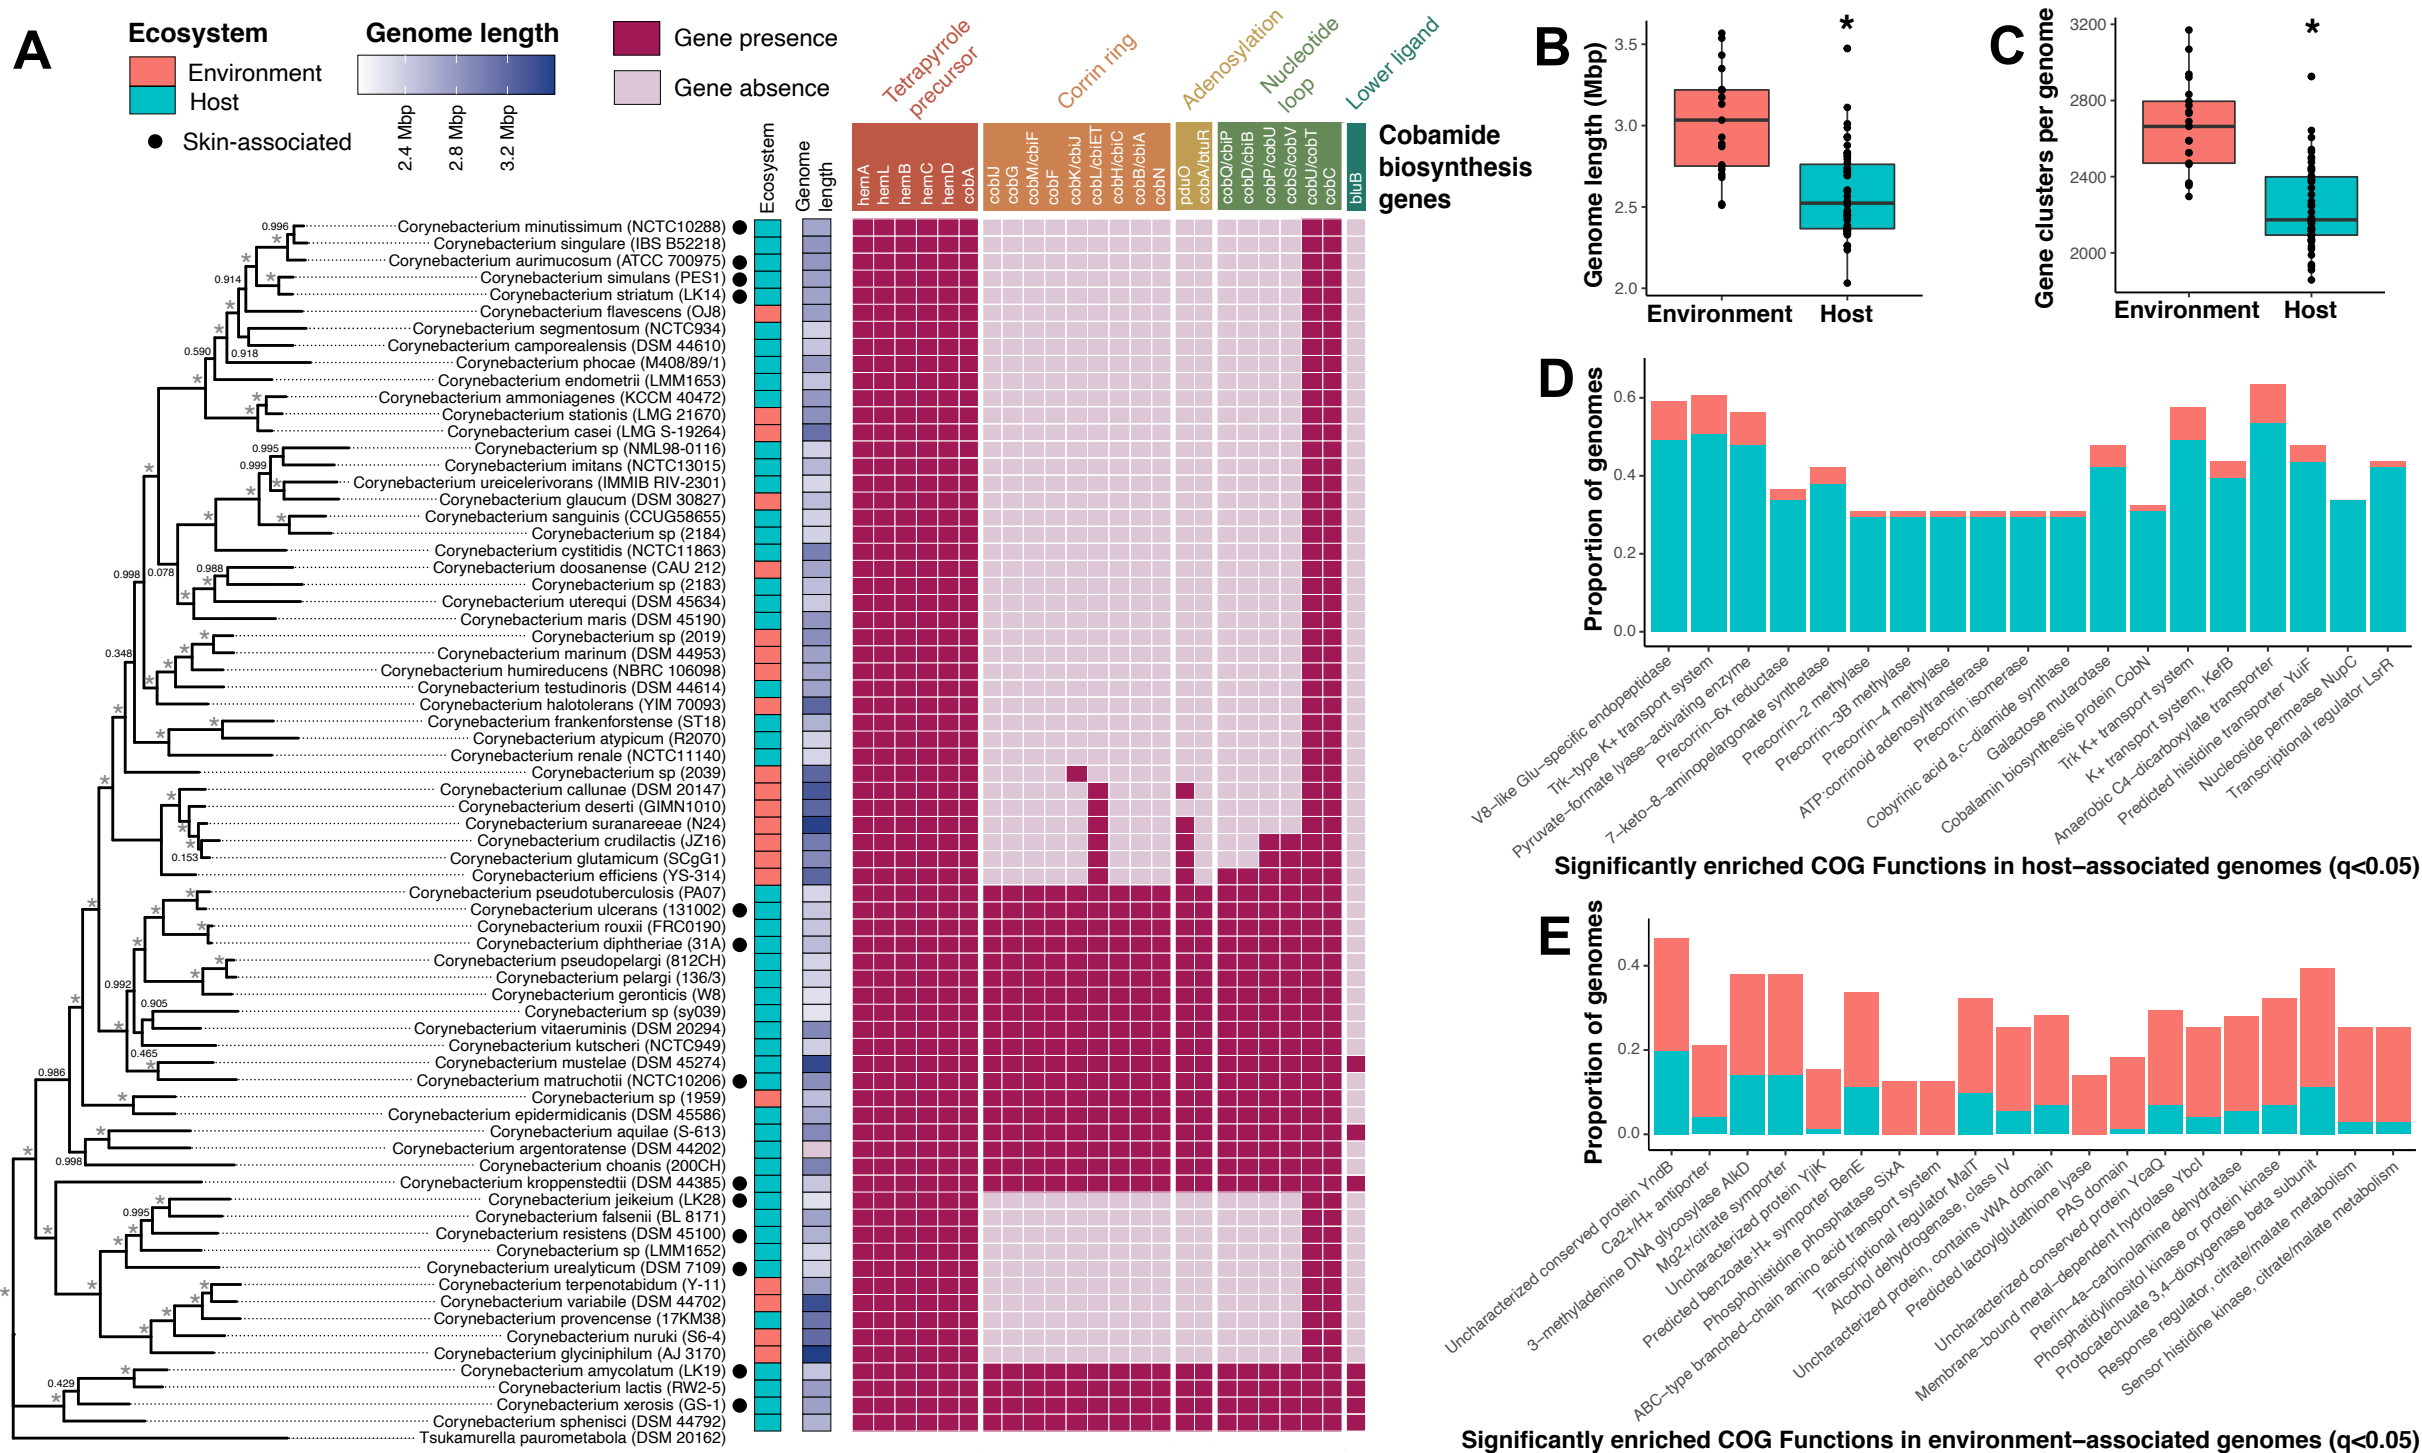

**Figure 7. De novo cobamide biosynthesis is host-associated within the *Corynebacterium* genus.** A) A *Corynebacterium* phylogenetic tree based on comparison of 71 conserved single copy genes was generated using FastTree within the anvi'o environment. The tree is rooted with *Tsukamurella paurometabola*, and bootstrapping values are indicated (\* = 100% bootstrap support). Species are colored by host (blue) or environment (orange) association, and by genome length (dark blue). KOfamScan was used to identify the presence (dark pink) or absence (light pink) of cobamide biosynthesis genes within each genome. Cobamide biosynthesis subsections are indicated and differentially colored based on B) Genome length and C) number of gene clusters for the *Corynebacterium* genomes were determined using anvi'o. Significantly enriched COG functions in D) host-associated or E) environment-associated genomes were identified with anvi'o. The top 20 significantly enriched COG functions ( $q < 0.05$ ) are shown, ordered by ascending significance. Blue = host-associated, orange = environment-associated.
